# Supplementary material for: iSCORE-PD: an isogenic stem cell collection to research Parkinson’s Disease
Source: PubMed Central journal article supplement (PMC10888955; doi:10.1101/2024.02.12.579917), 2024-02-13

# Supplemental Figure 1, Busquets et al.

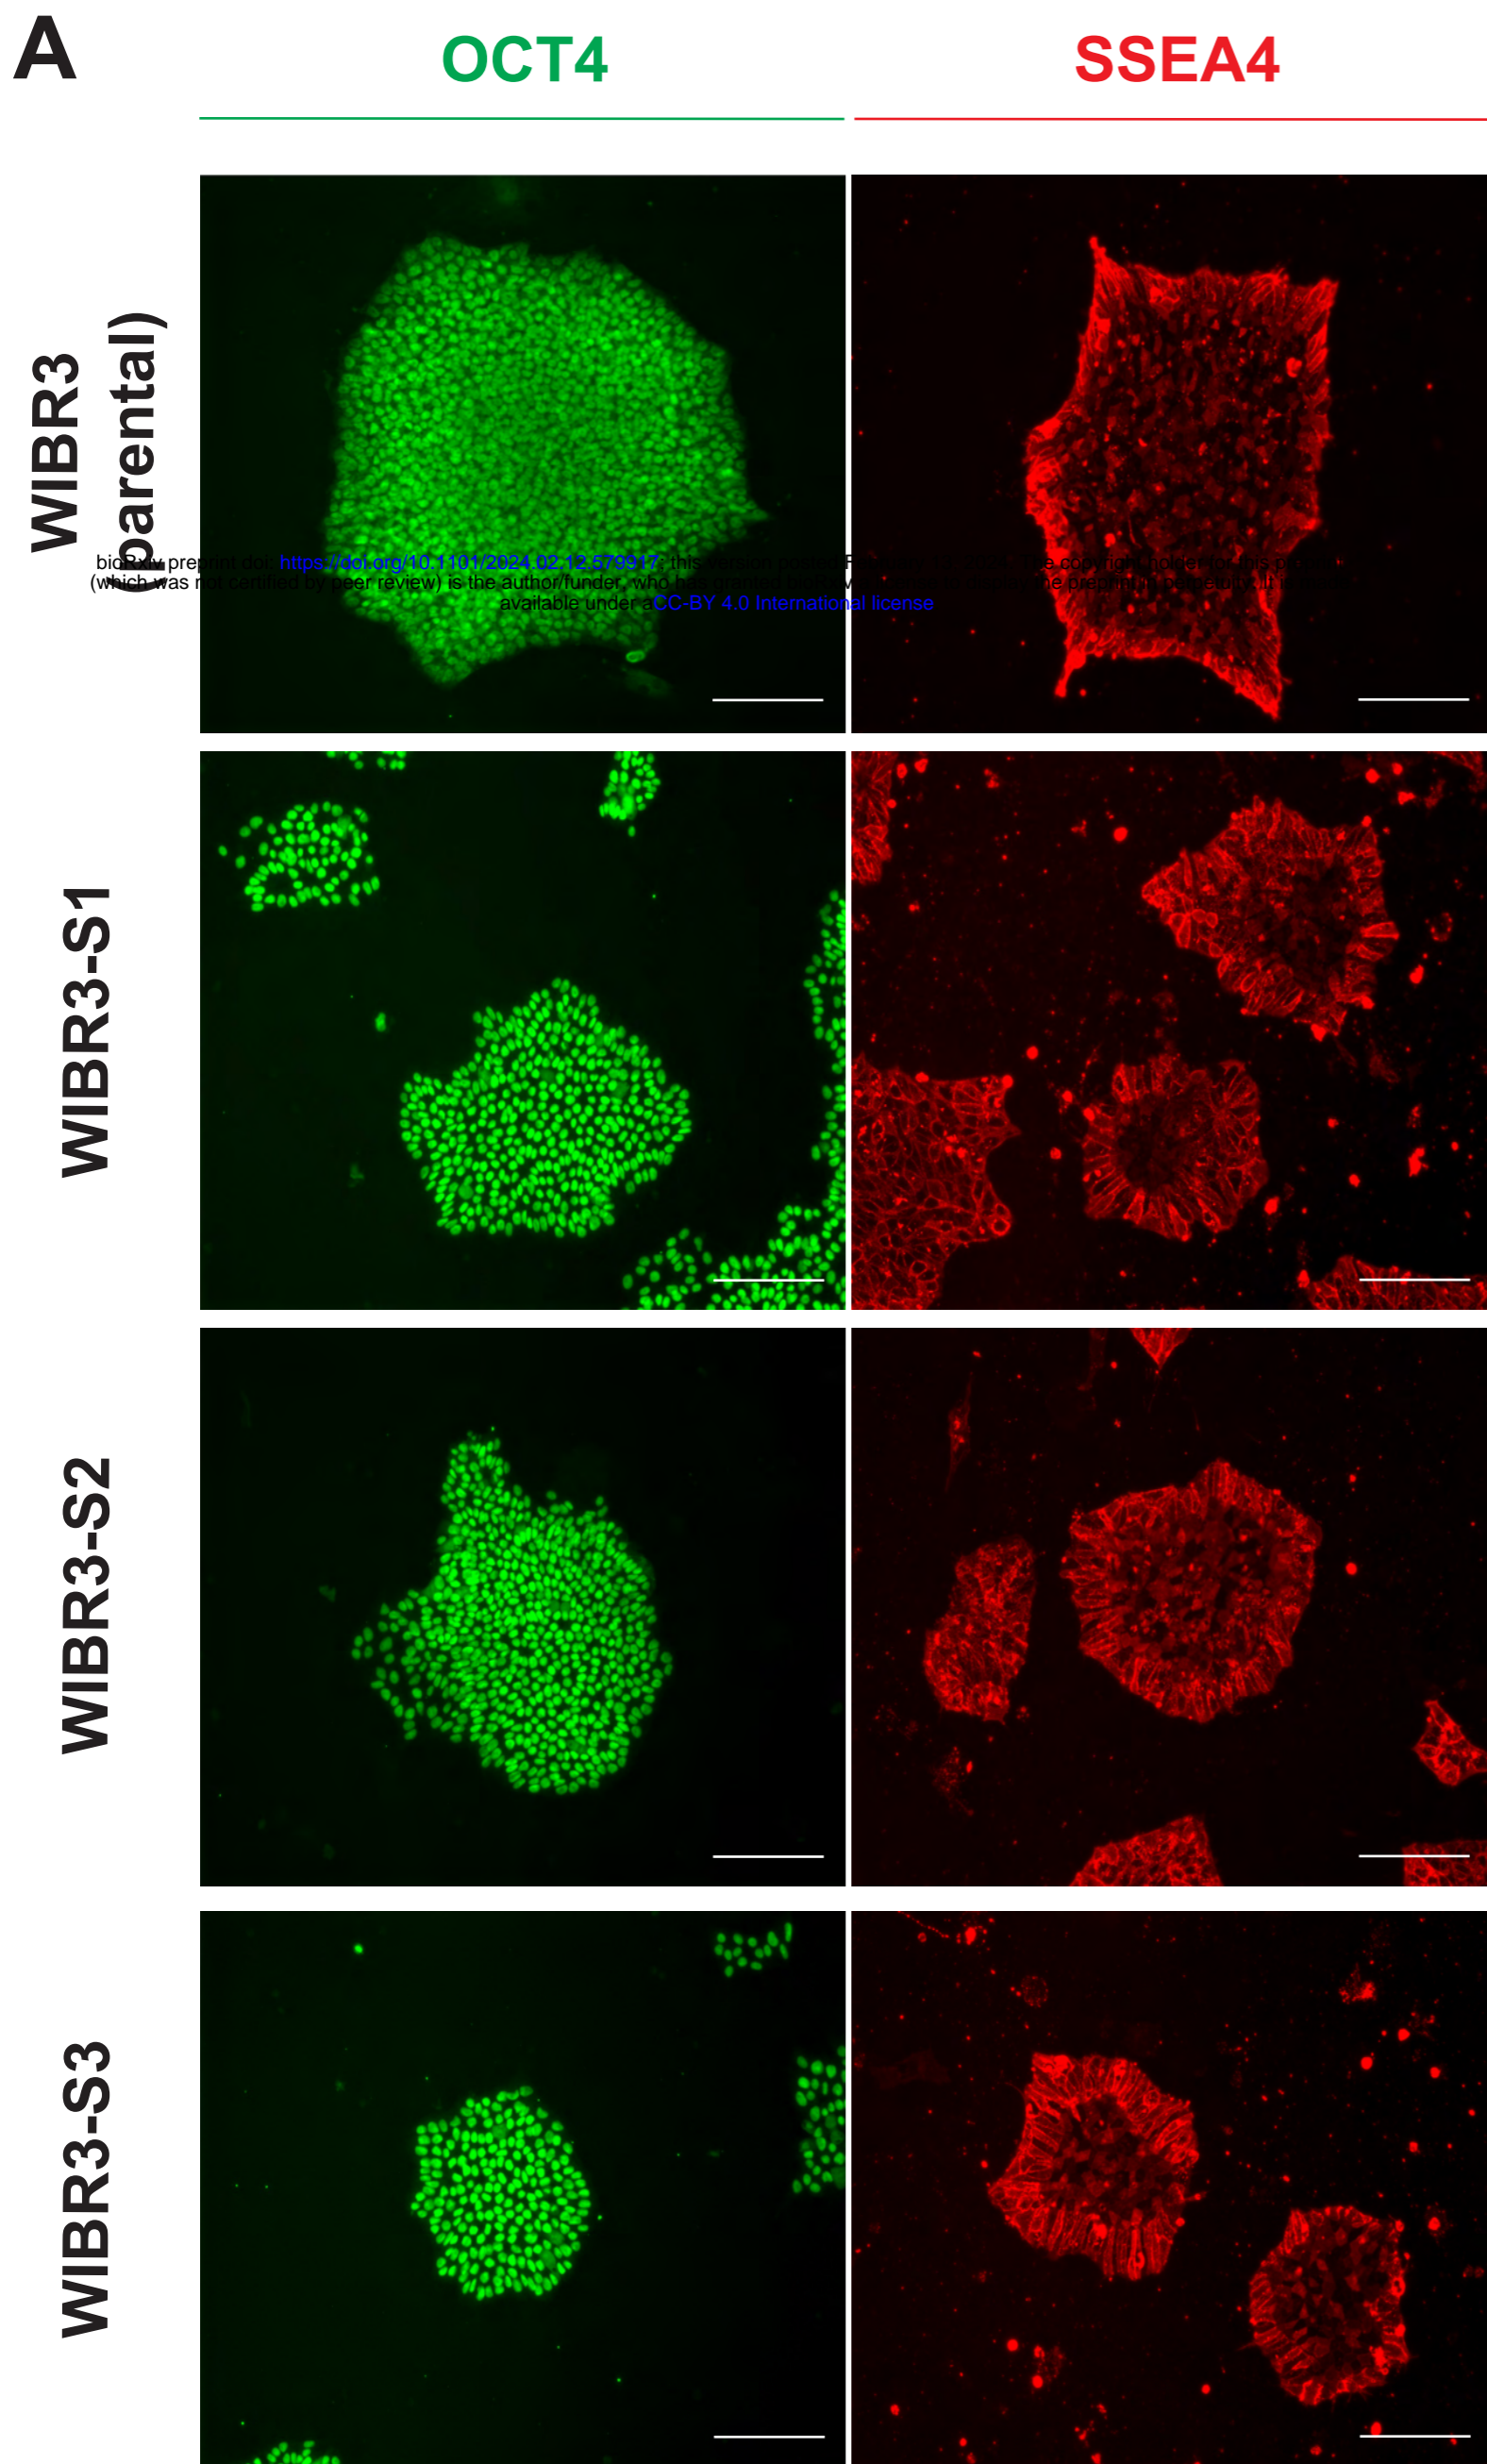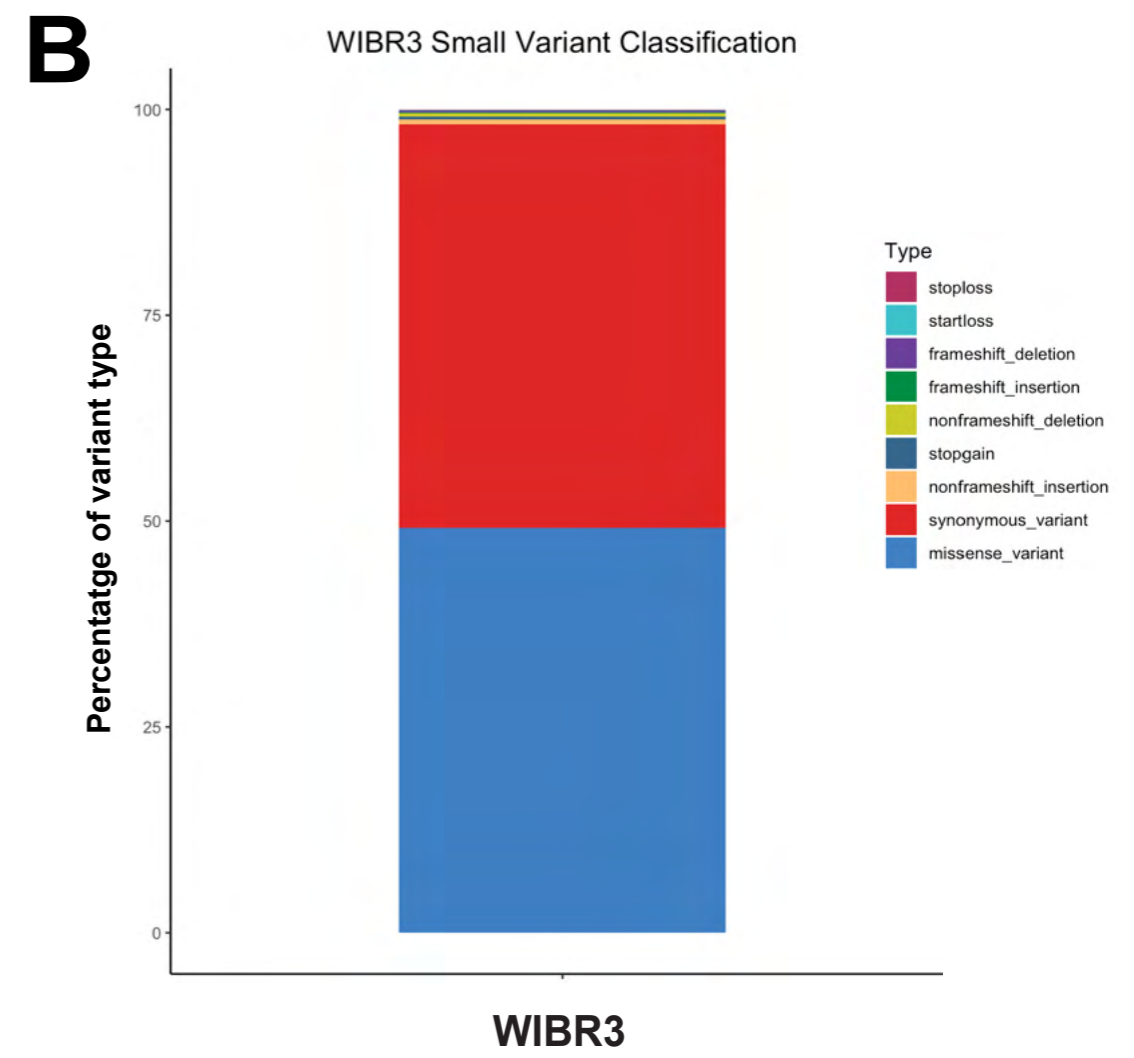

Supplemental Figure 2, Busquets et al.

**A**

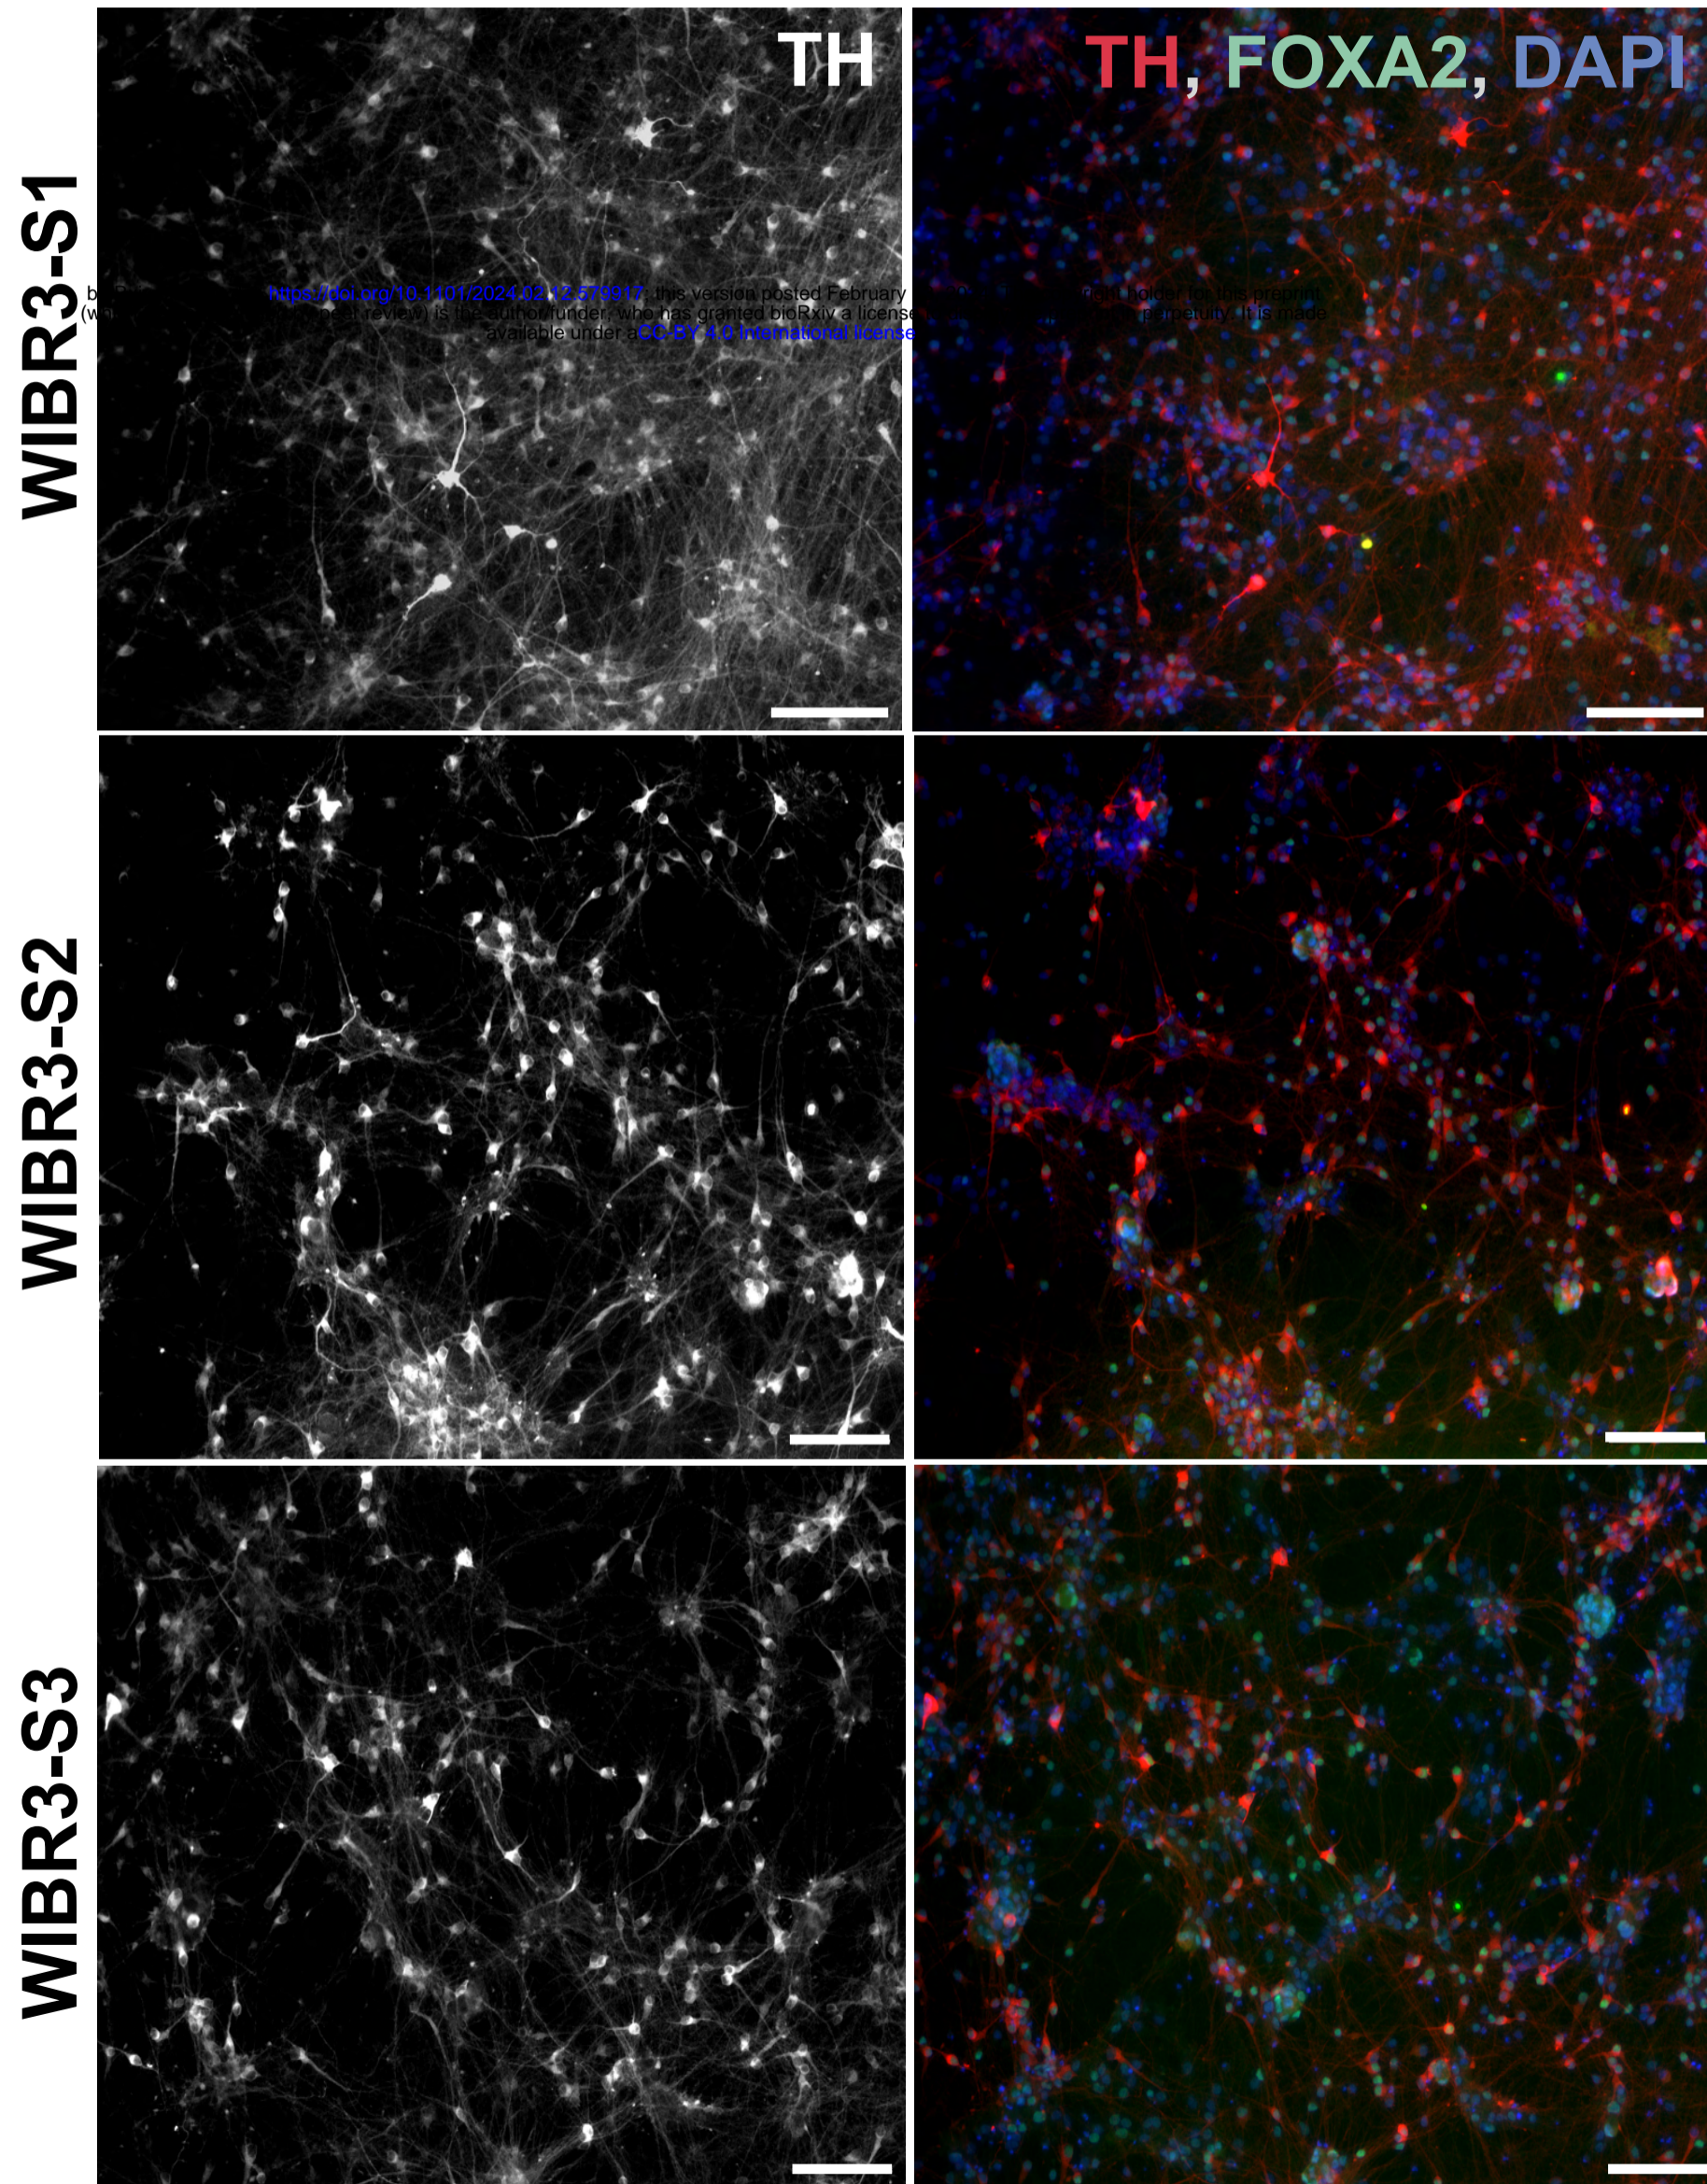

**B**

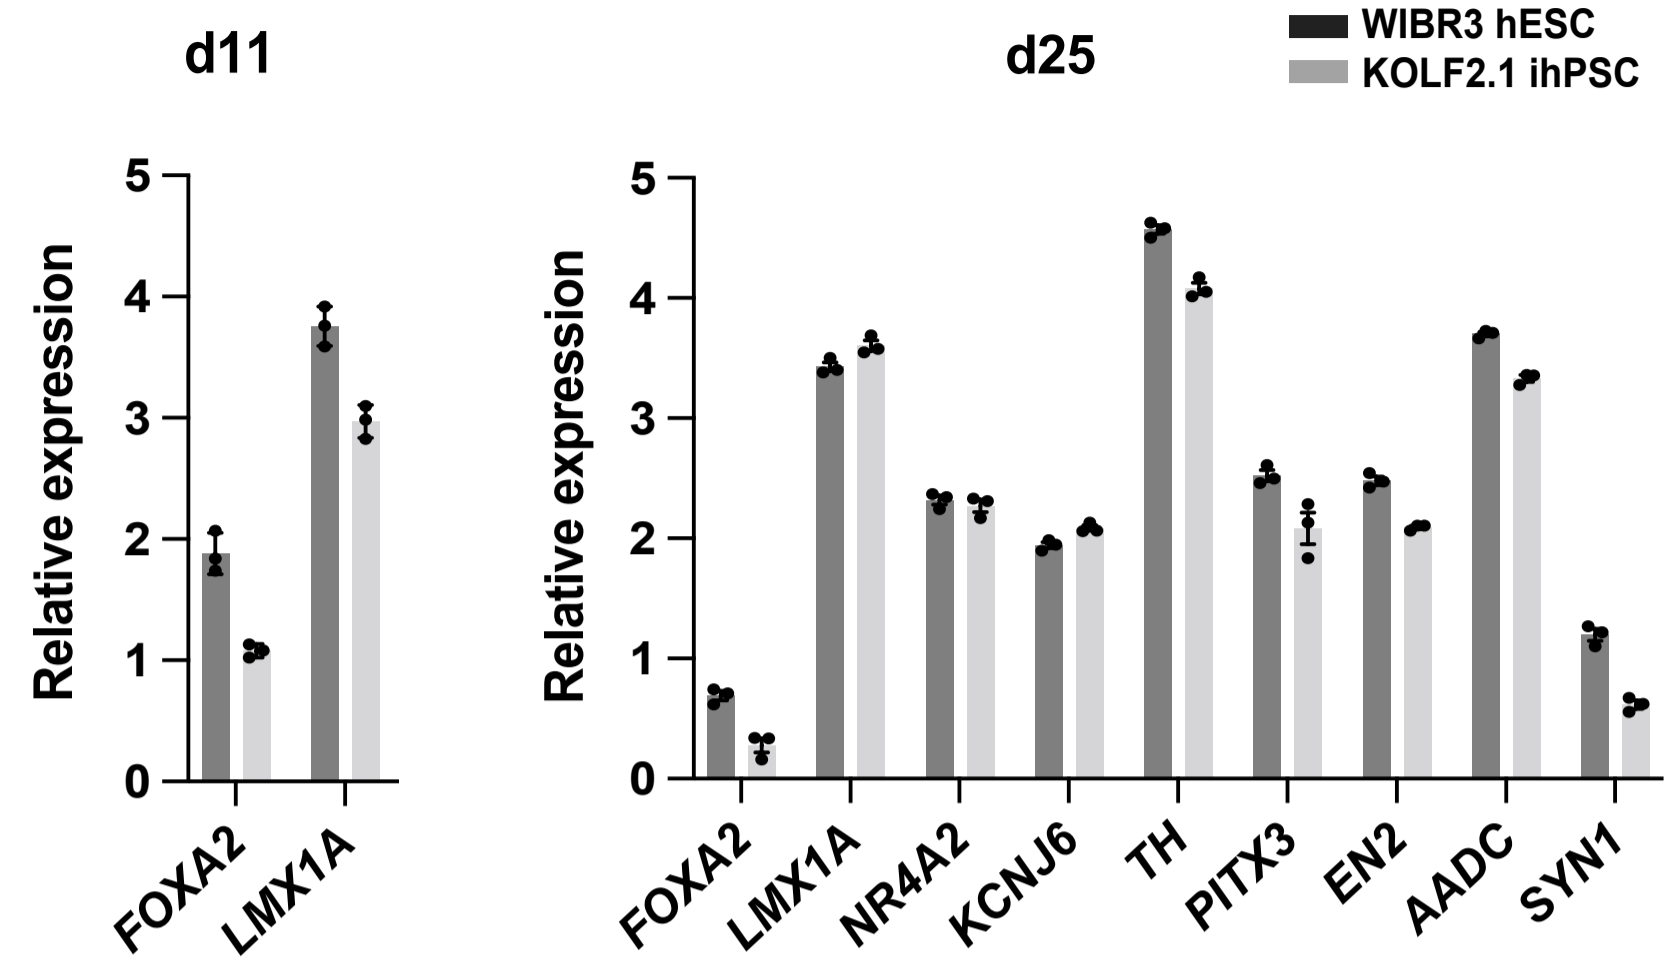

# Supplemental Figure 3, Busquets et al.

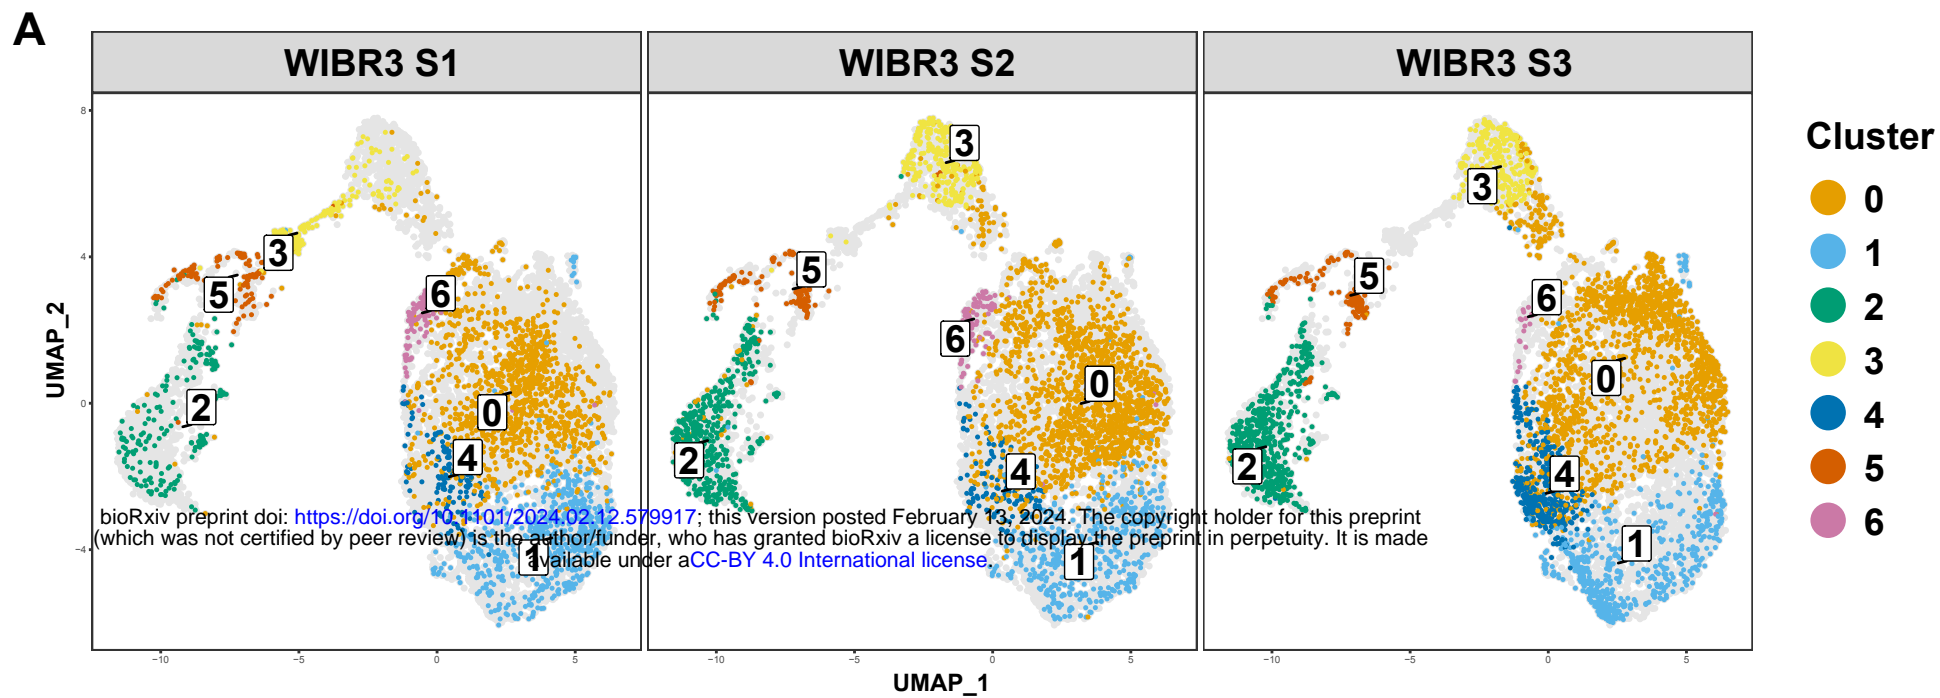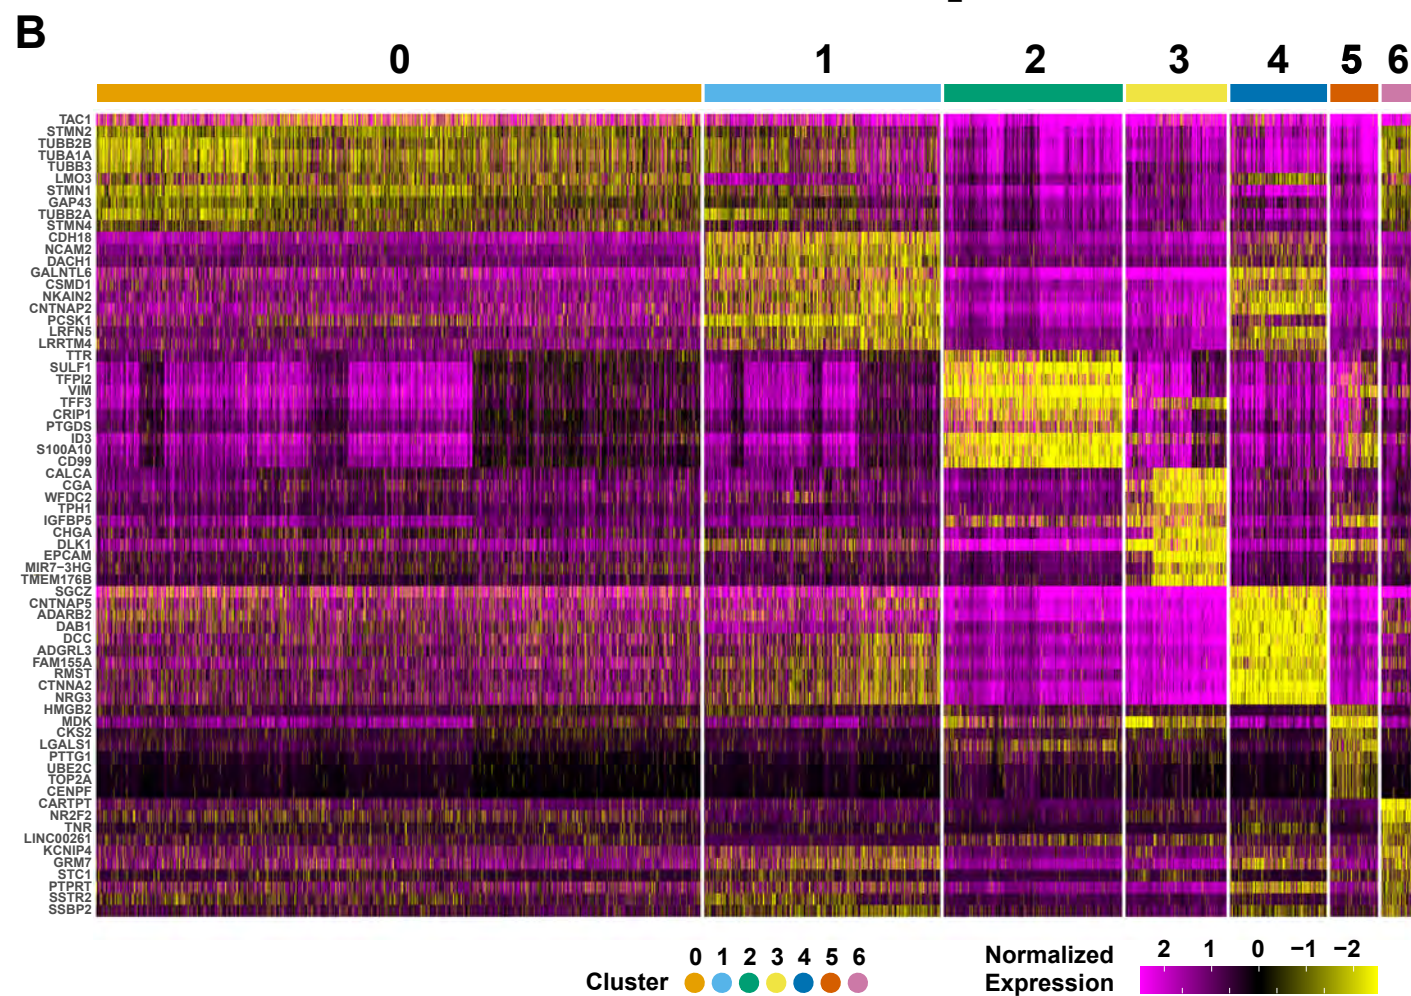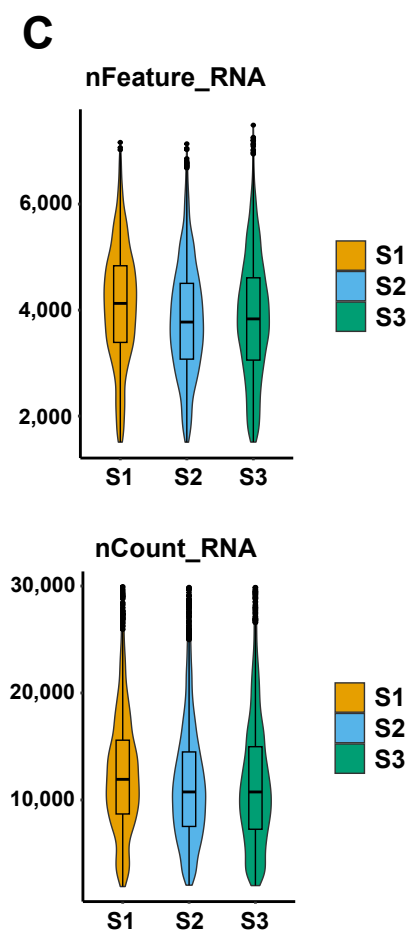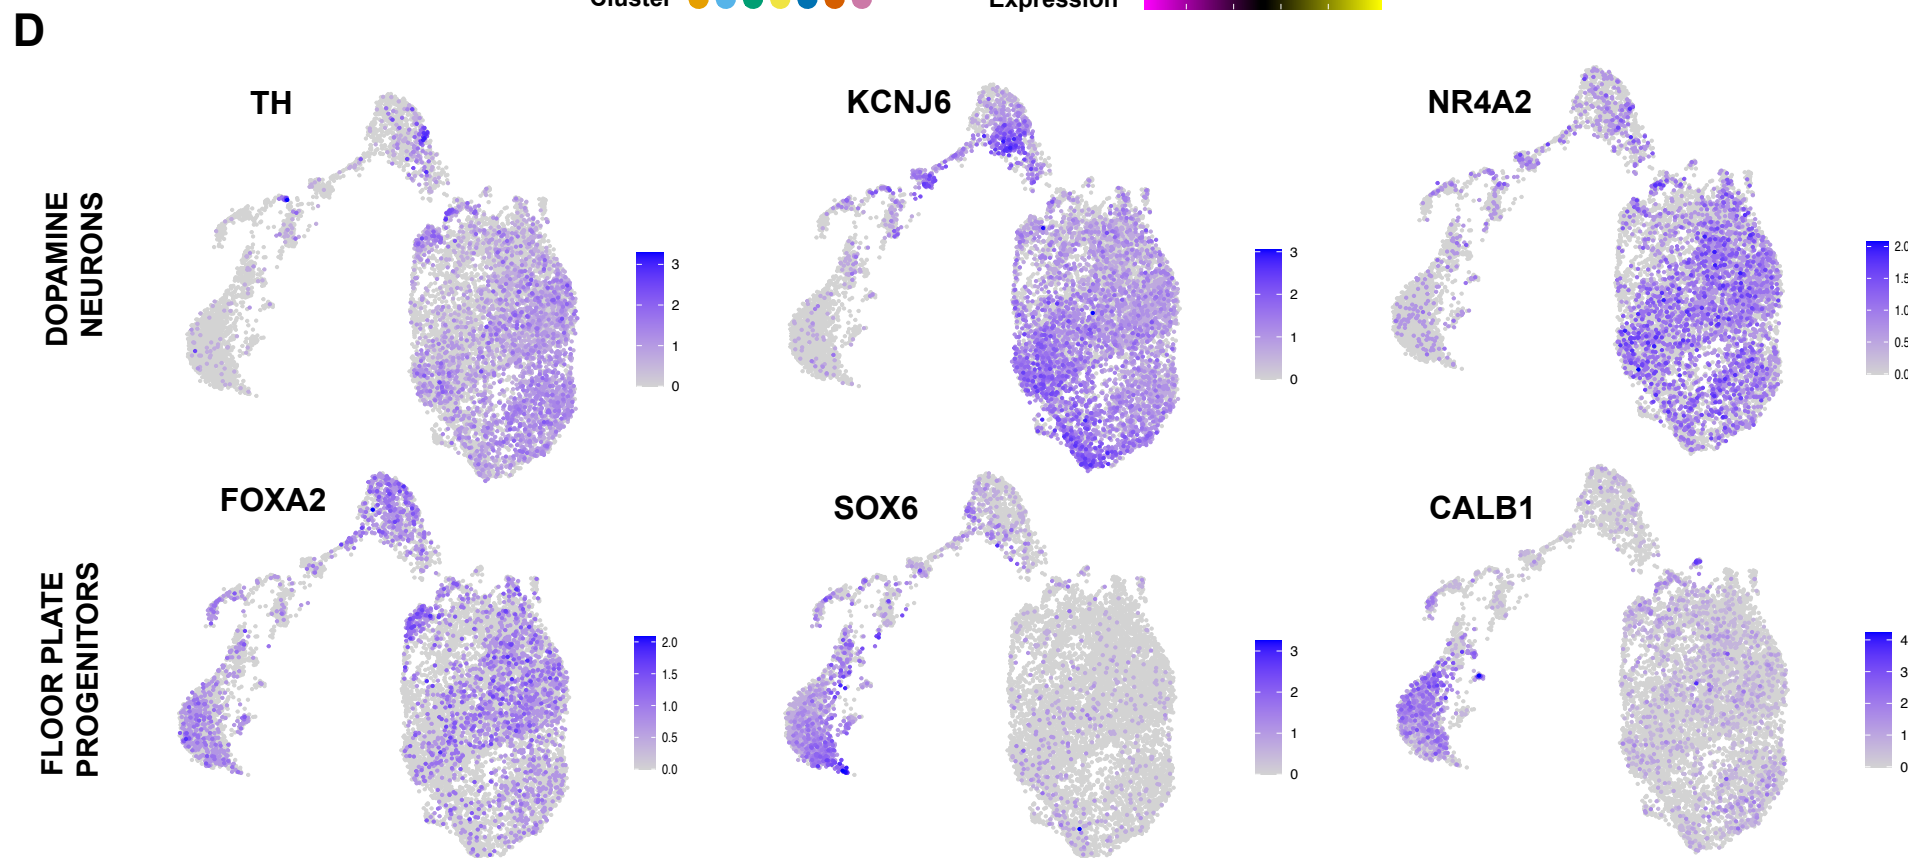

Supplemental Figure 4, Busquets et al.,

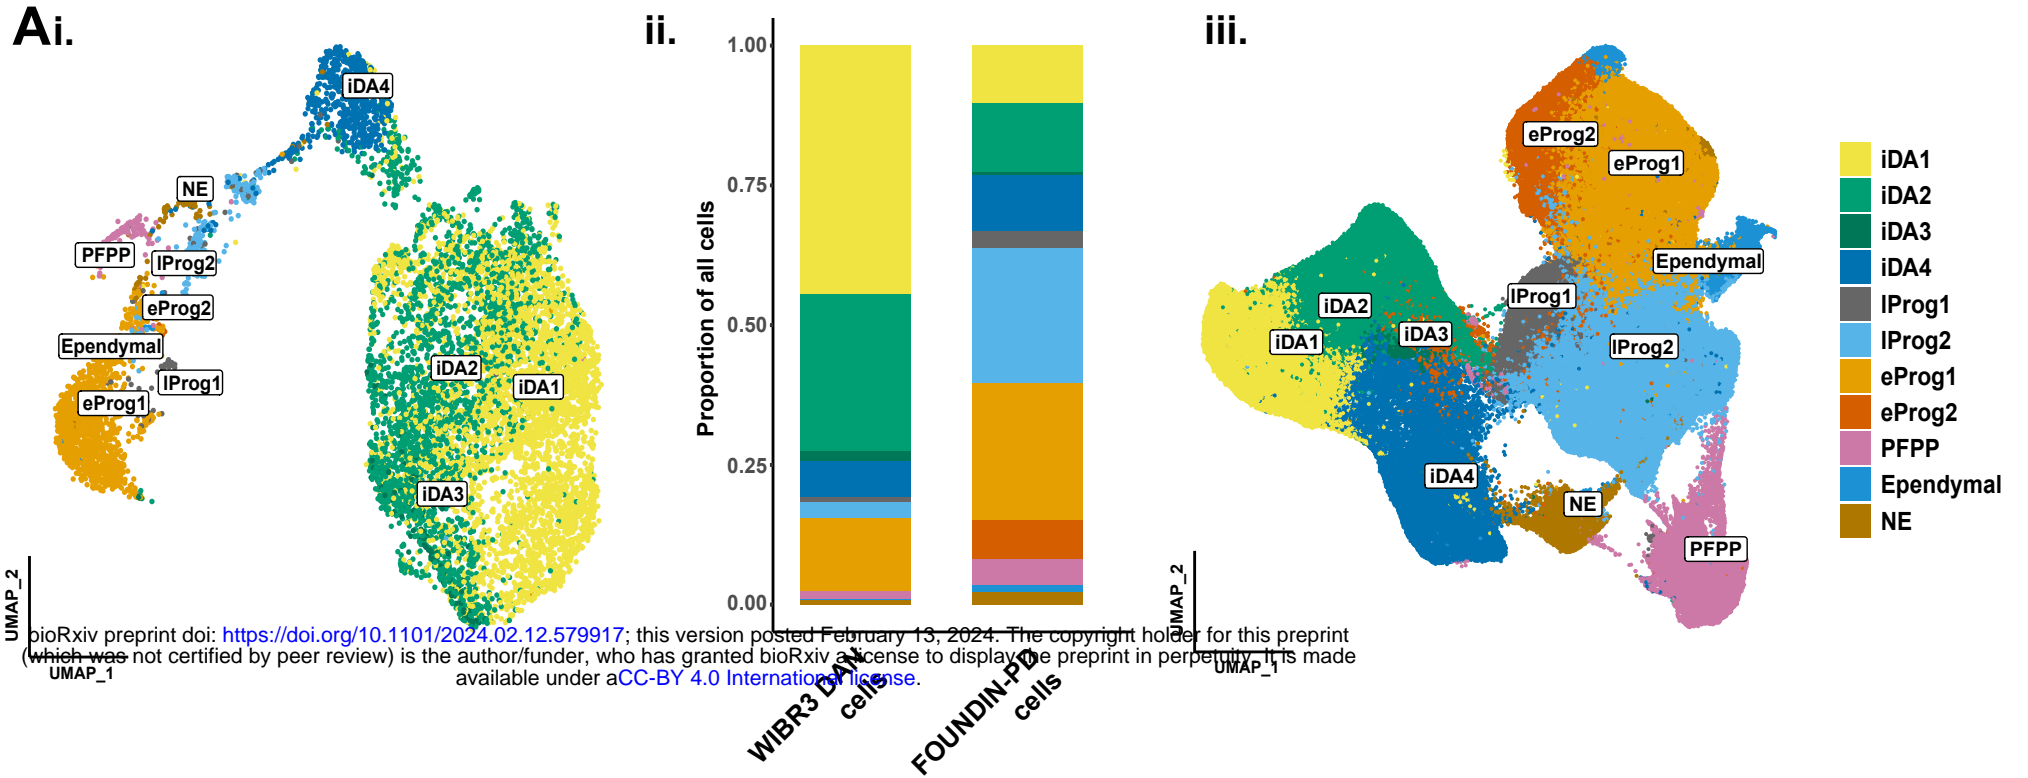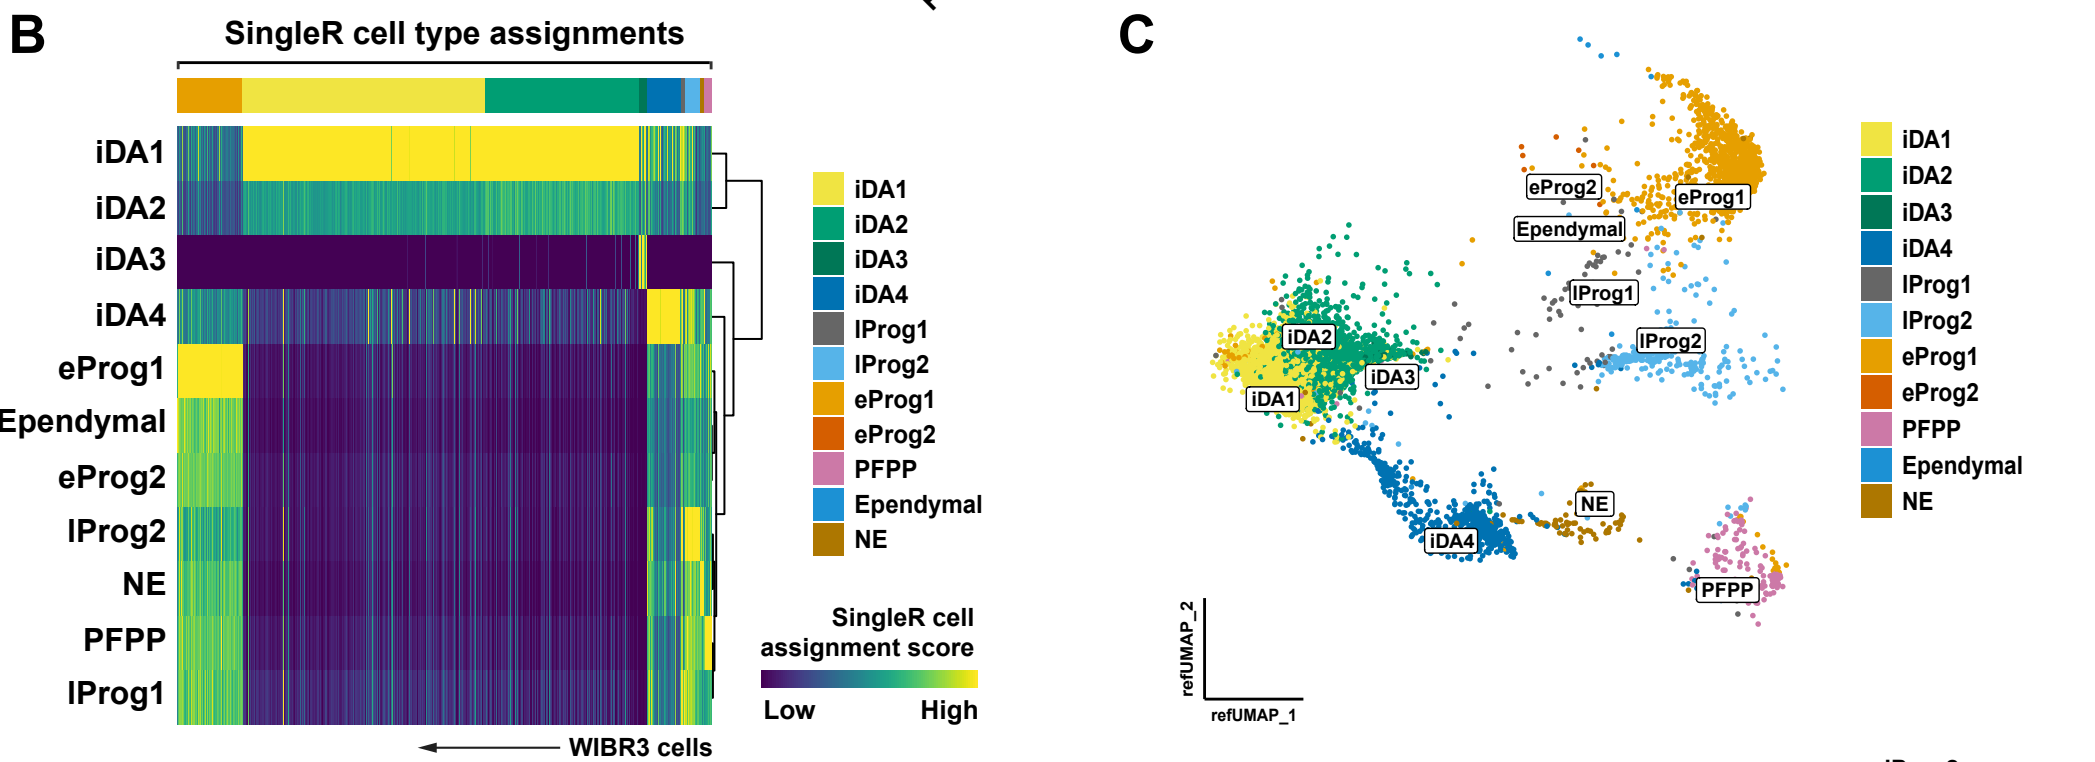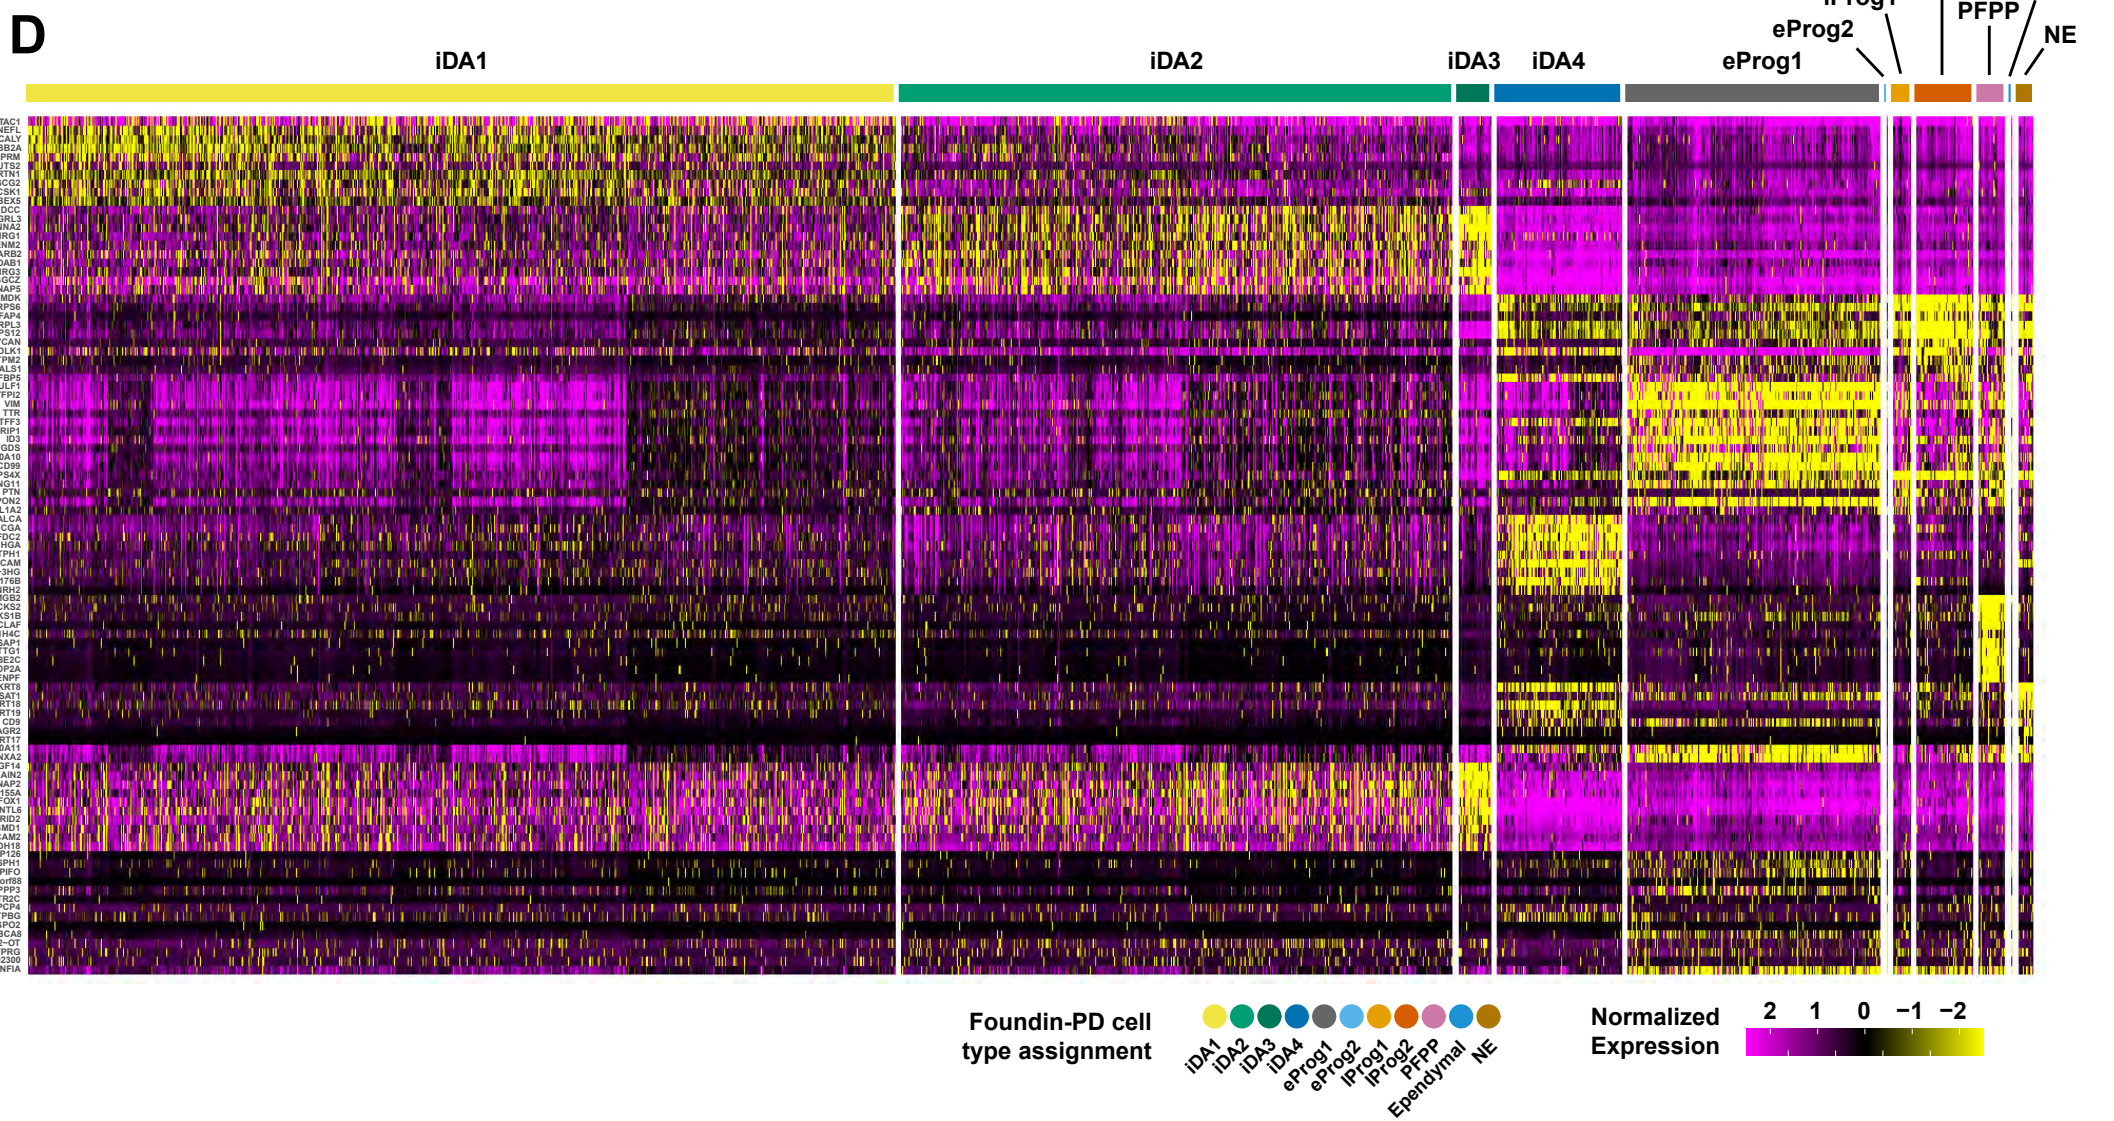

## Supplemental Figure 5. Microglia ICC, Busquets et al.

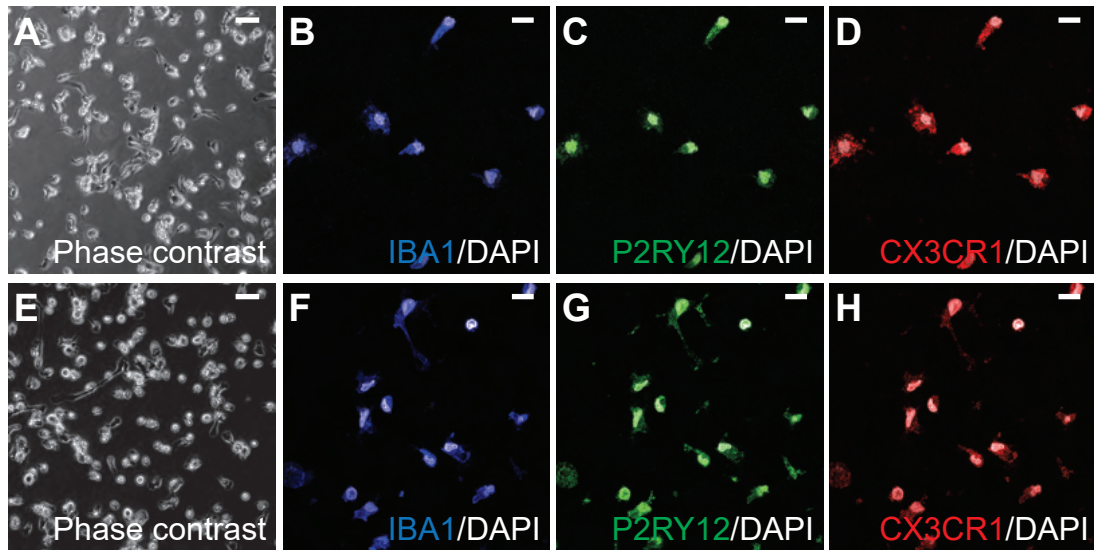

# Supplemental Figure 6, Busquets et al.

WIBR3\_EWT\_S1

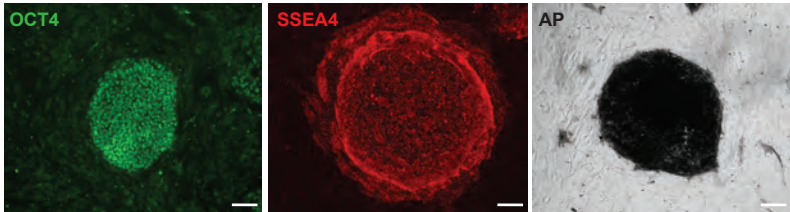

WIBR3\_EWT\_S5

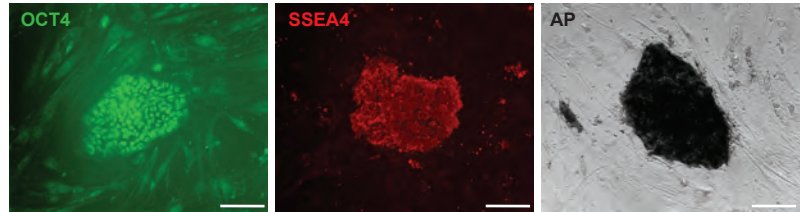

WIBR3\_EWT\_S2

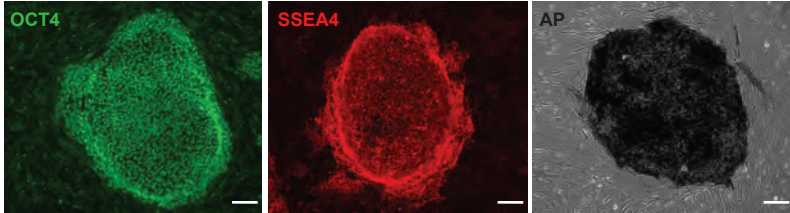

WIBR3\_EWT\_S6

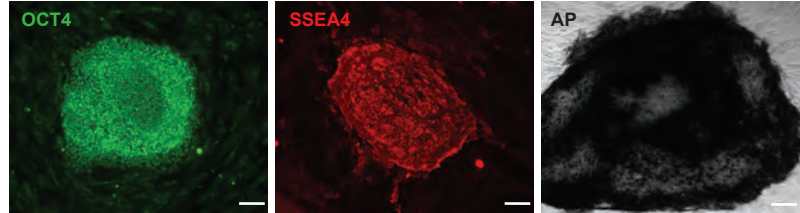

WIBR3\_EWT\_S3

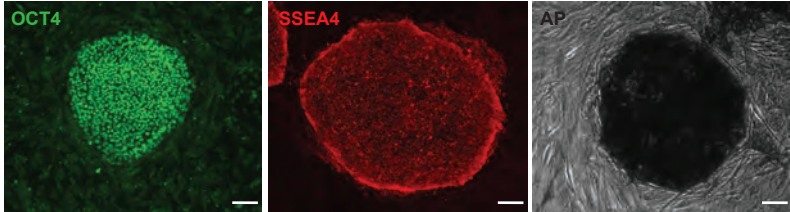

WIBR3\_EWT\_S7

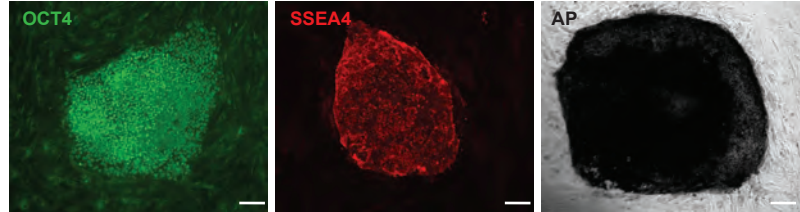

WIBR3\_EWT\_S4

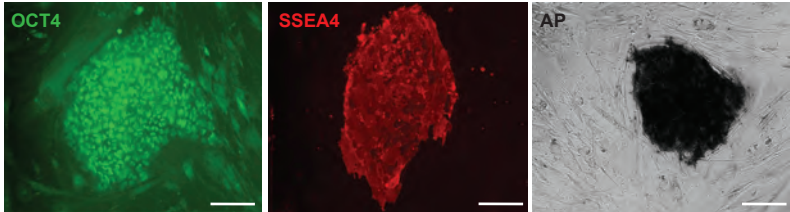

WIBR3\_EWT\_S8

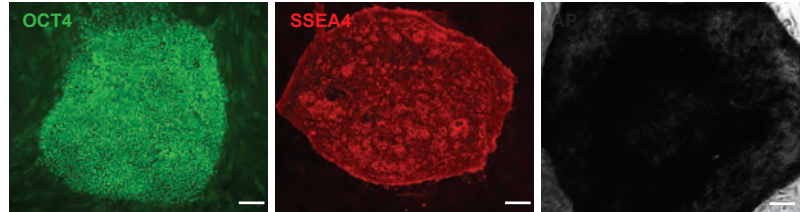

# Supplemental Figure 7. SNCA, Busquets et al.

**A**

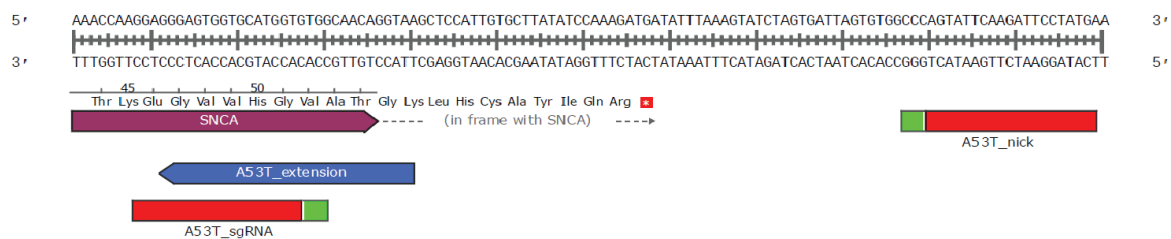

**B**

## WIBR3\_SNCA\_A53T\_1

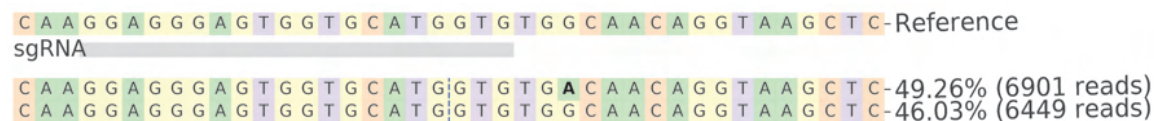

## WIBR3\_SNCA\_A53T\_2

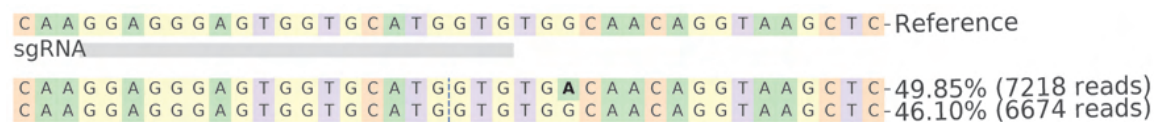

## WIBR3\_SNCA\_A53T\_4

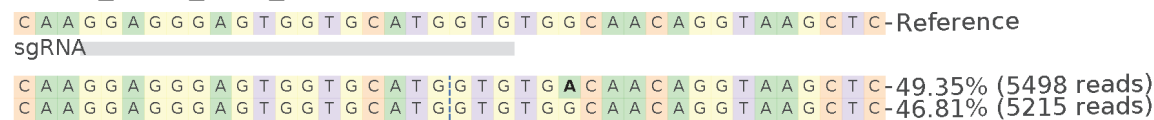

**D**

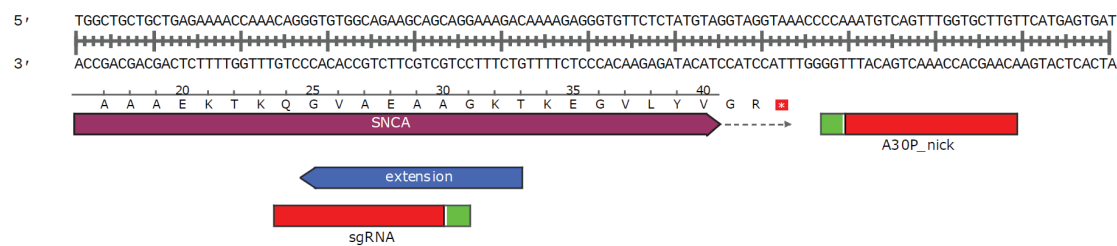

**E**

## WIBR3\_SNCA\_A30P\_A2-3

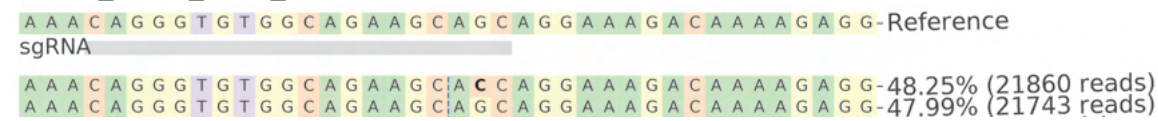

## WIBR3\_SNCA\_A30P\_Homo\_C8-2

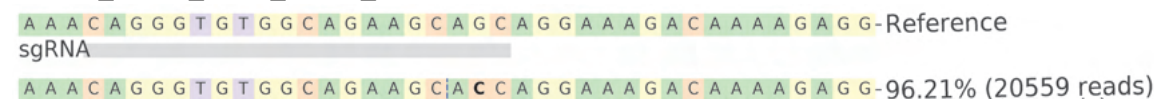

## WIBR3\_SNCA\_A30P\_E1-3

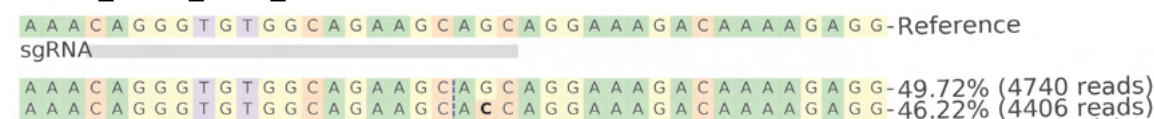

## WIBR3\_SNCA\_A30P\_F12-1

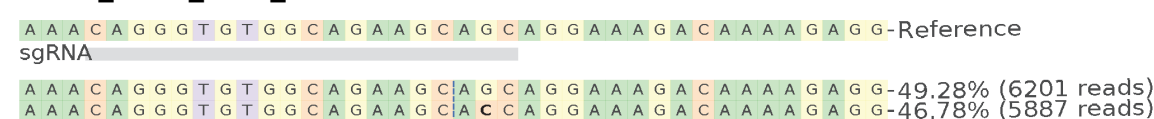

**C**

## WIBR3\_SNCA\_A53T\_1

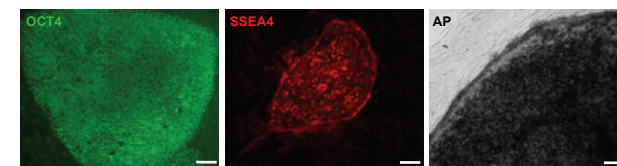

## WIBR3\_SNCA\_A53T\_2

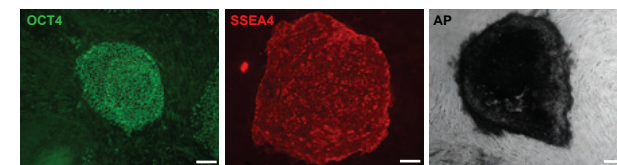

## WIBR3\_SNCA\_A53T\_4

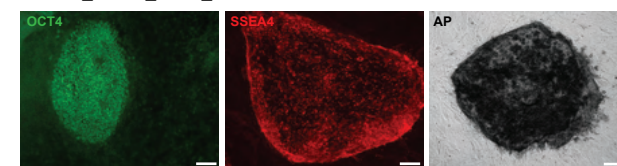

**F**

## WIBR3\_SNCA\_A30P\_A2-3

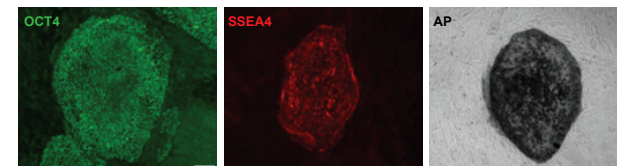

## WIBR3\_SNCA\_A30P\_Homo\_C8-2

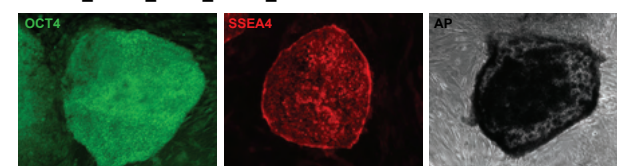

## WIBR3\_SNCA\_A30P\_E1-3

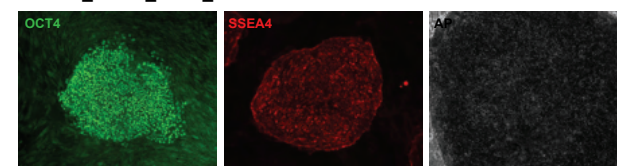

## WIBR3\_SNCA\_A30P\_F12-1

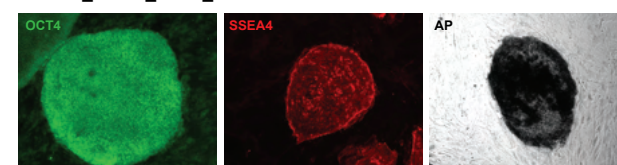

**G**

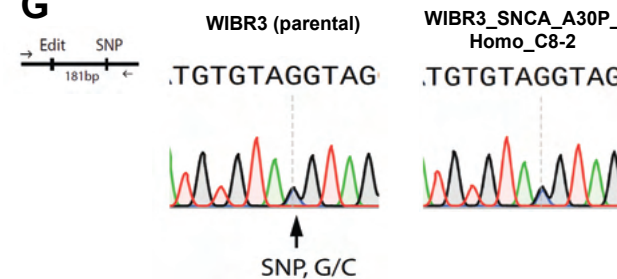

# Supplemental Figure 8, PRKN, Busquets et al.

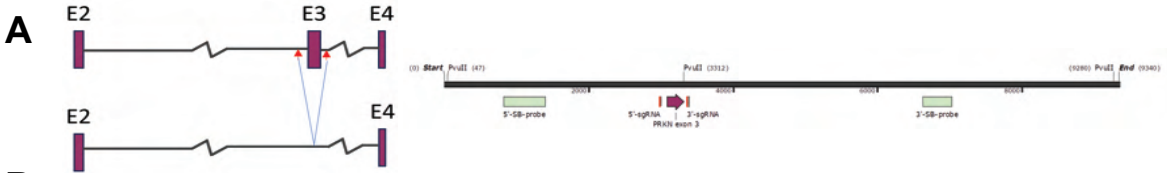

**B**

## WIBR3\_PRKN\_X3DEL\_B1-3

T T T T G C T T C C C T T C T A C C A C G C A T G G A G C A T G G C C T C A C C -Reference  
 sgRNA

T T T T G C T T C C C T T C T A C C A C | G C A T G G A G C A T G G C C T C A C C -98.85% (1376 reads)

## WIBR3\_PRKN\_X3DEL\_F2-5

T T T T G C T T C C C T T C T A C C A C G C A T G G A G C A T G G C C T C A C C -Reference  
 sgRNA

T T T T G C T T C C C T T C T A C C A C T | G C A T G G A G C A T G G C C T C A C C -50.75% (3522 reads)  
 T T T T G C T T C C C T T C T A C C A C | T G C A T G G A G C A T G G C C T C A C -47.95% (3328 reads)

## WIBR3\_PRKN\_X3DEL\_H2-2

T T T T G C T T C C C T T C T A C C A C G C A T G G A G C A T G G C C T C A C C -Reference  
 sgRNA

T T T T G C T T C C C T T C T A C C A C | G C A T G G A G C A T G G C C T C A C C -50.25% (7891 reads)  
 T T T T G C T T C C C T T C T A C C A C | T G C A T G G A G C A T G G C C T C A C -48.33% (7591 reads)

**C**

## WIBR3\_PRKN\_X3DEL\_B1-3

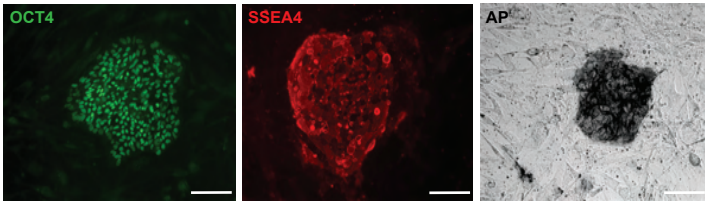

## WIBR3\_PRKN\_X3DEL\_F2-5

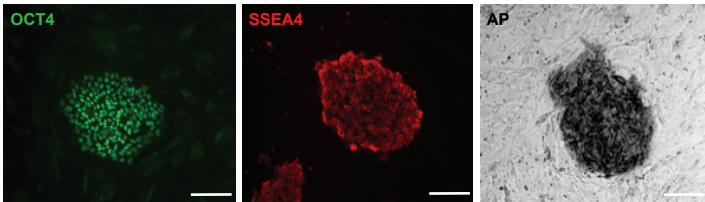

## WIBR3\_PRKN\_X3DEL\_B1-3

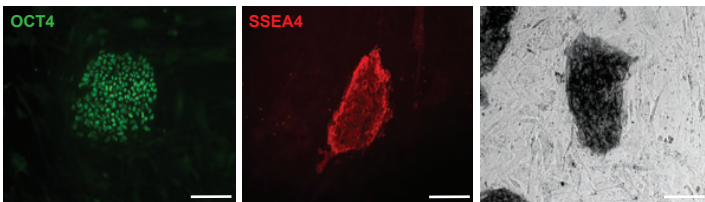

**D**

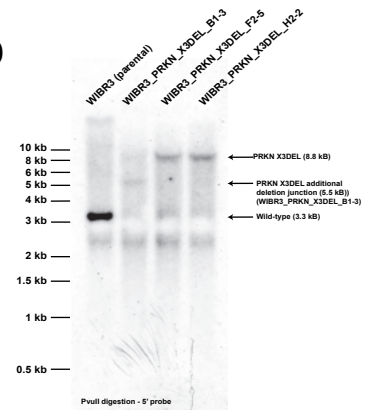

**E**

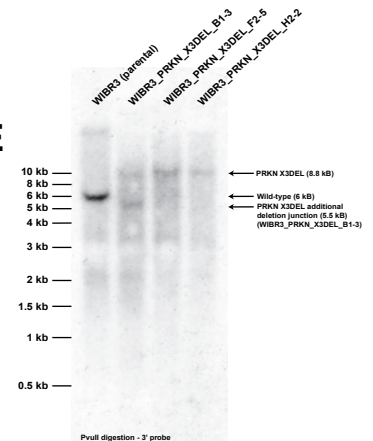

**F**

## Deletion junction in clone WIBR3\_PRKN\_X3DEL\_B1-3

G G C A A C A G A A G A G C T T G A G A A A G C A G C A G G G A A G G G C A T C A T T C A T C T T T T A T G A G A A T G -Reference  
 G G C A A C A G A A G A G C T T G A G A A A G C A G C A G G G A A G G G C A T C A T T C A T C T T T T A T G A G A A T G -90.29% (3440 reads)



# Supplemental Figure 9. PINK1, Busquets et al.

## A

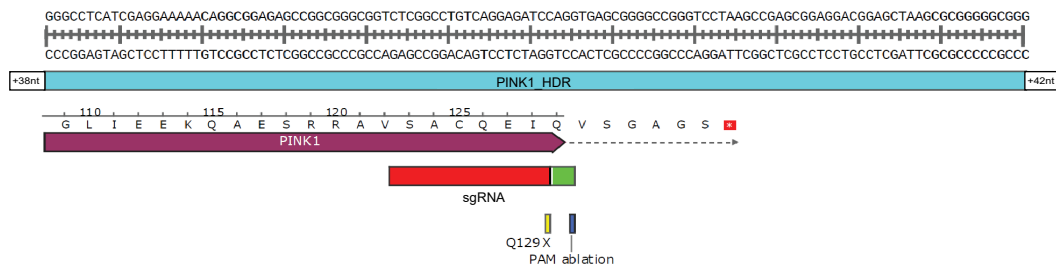

## B

### WIBR3\_PINK1\_Q129X\_C4-1

T G T C A G G A G A T C C A G G T G A G - Reference  
 sgRNA  
 T G T C A G G A G A | T C T A G C T G A G - 95.86% (671 reads)

### WIBR3\_PINK1\_Q129X\_E2-2

T G T C A G G A G A T C C A G G T G A G - Reference  
 sgRNA  
 T G T C A G G A G A | T C T A G C T G A G - 96.48% (741 reads)

### WIBR3\_PINK1\_Q129X\_E7-1

T G T C A G G A G A T C C A G G T G A G - Reference  
 sgRNA  
 T G T C A G G A G A | T C T A G C T G A G - 98.28% (572 reads)

## C

### WIBR3\_PINK1\_Q129X\_C4-1

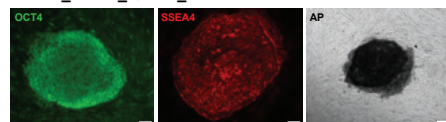

### WIBR3\_PINK1\_Q129X\_E2-2

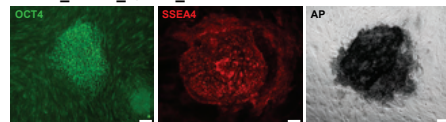

### WIBR3\_PINK1\_Q129X\_C4-1

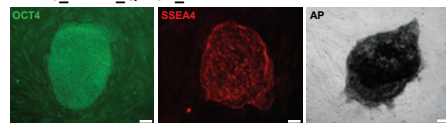

## D

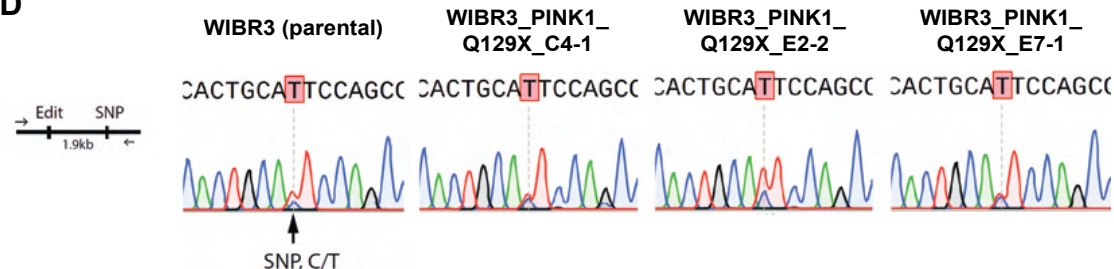

# Supplemental Figure 10, DJ1. Busquets et al.

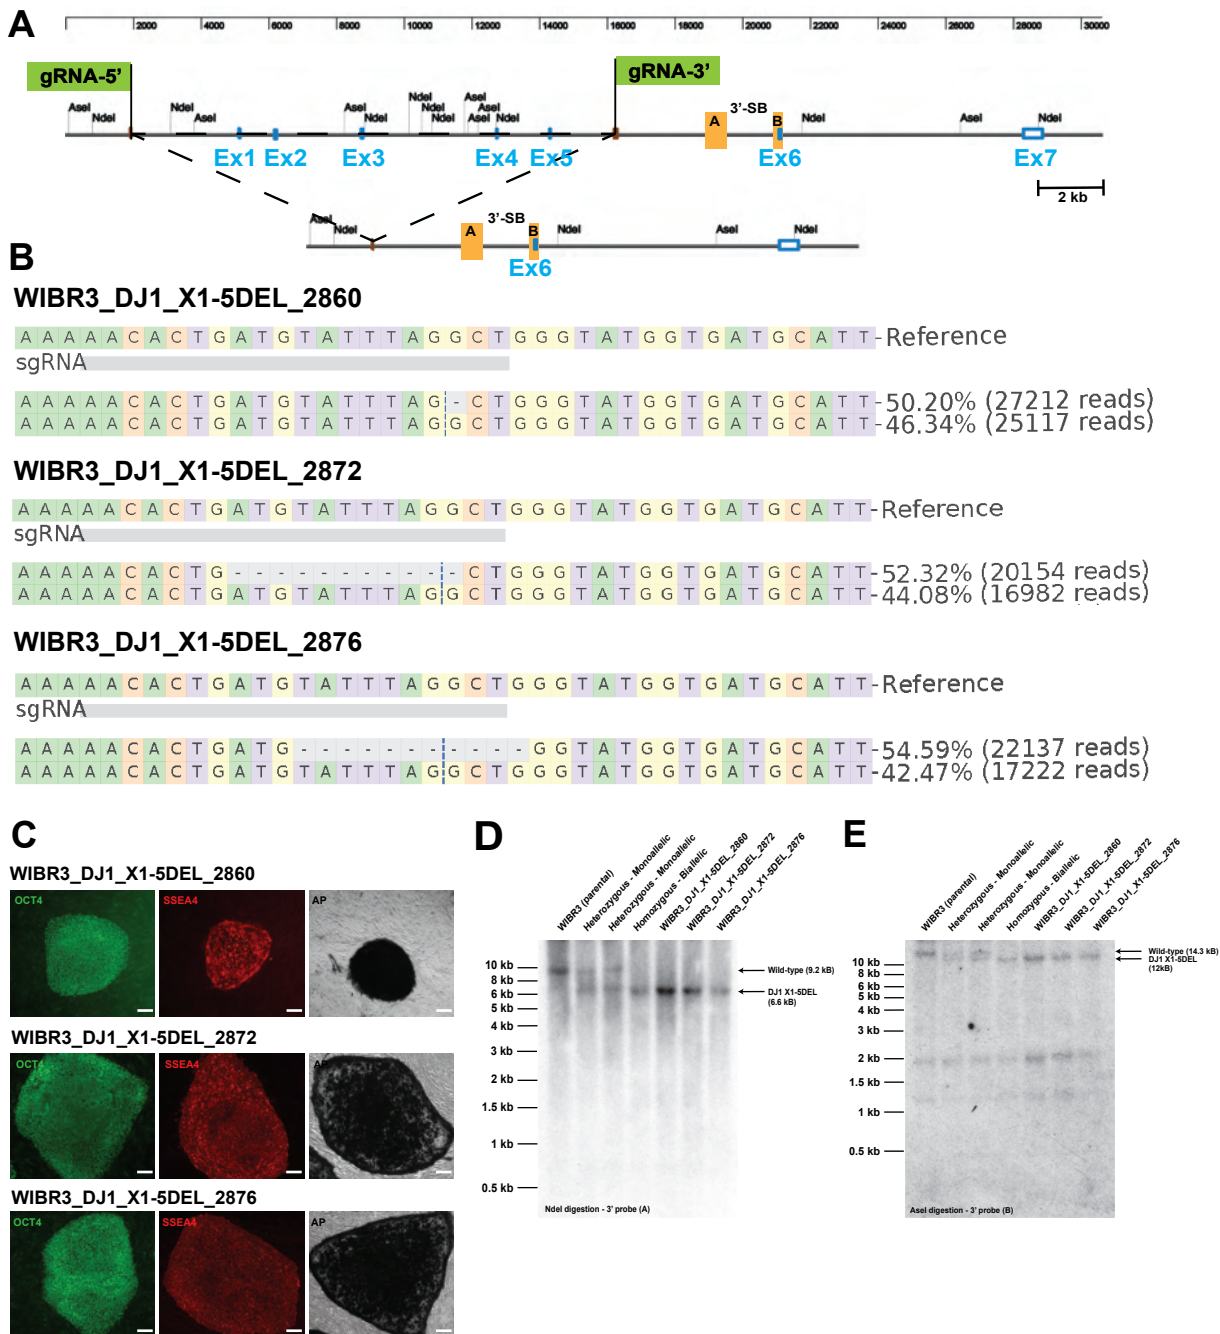

# Supplemental Figure 11. LRRK2, Busquets et al.

**A**

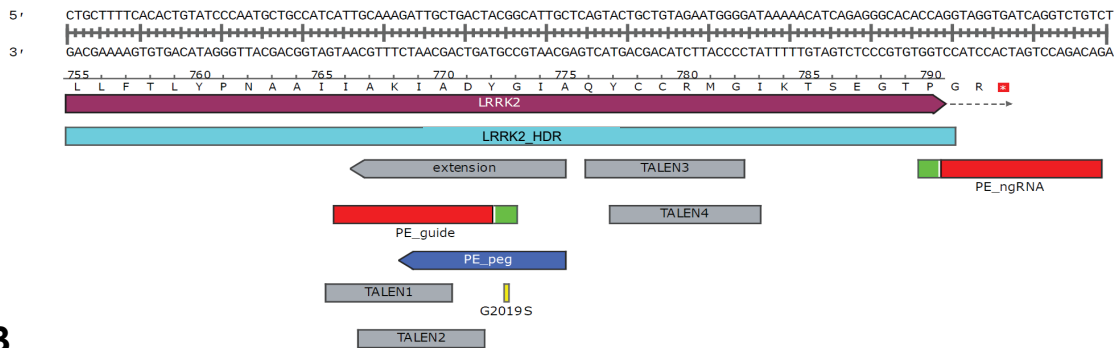

**B**

## WIBR3\_LRRK2\_G2019S\_5\_Het

A G T A C T G A G C A A T G C C G T A G T C A G C A A T C T T T G C A A T G A T-Reference  
 sgRNA

A G T A C T G A G C A A T G C T G T A G T C A G C A A T C T T T G C A A T G A T-49.74% (9261 reads)  
 A G T A C T G A G C A A T G C C G T A G T C A G C A A T C T T T G C A A T G A T-45.92% (8550 reads)

## WIBR3\_LRRK2\_G2019S\_6\_Het

A G T A C T G A G C A A T G C C G T A G T C A G C A A T C T T T G C A A T G A T-Reference  
 sgRNA

A G T A C T G A G C A A T G C T G T A G T C A G C A A T C T T T G C A A T G A T-49.19% (9607 reads)  
 A G T A C T G A G C A A T G C C G T A G T C A G C A A T C T T T G C A A T G A T-46.62% (9105 reads)

## WIBR3\_LRRK2\_G2019S\_65\_Homo

A G T A C T G A G C A A T G C C G T A G T C A G C A A T C T T T G C A A T G A T-Reference  
 sgRNA

A G T A C T G A G C A A T G C T G T A G T C A G C A A T C T T T G C A A T G A T-95.45% (23624 reads)

## WIBR3\_LRRK2\_G2019S\_216\_Het

A G T A C T G A G C A A T G C C G T A G T C A G C A A T C T T T G C A A T G A T-Reference  
 sgRNA

A G T A C T G A G C A A T G C T G T A G T C A G C A A T C T T T G C A A T G A T-50.30% (8240 reads)  
 A G T A C T G A G C A A T G C C G T A G T C A G C A A T C T T T G C A A T G A T-44.99% (7370 reads)

## WIBR3\_LRRK2\_G2019S\_2093\_Het

A G T A C T G A G C A A T G C C G T A G T C A G C A A T C T T T G C A A T G A T-Reference  
 sgRNA

A G T A C T G A G C A A T G C T G T A G T C A G C A A T C T T T G C A A T G A T-49.14% (10670 reads)  
 A G T A C T G A G C A A T G C C G T A G T C A G C A A T C T T T G C A A T G A T-46.14% (10017 reads)

**C**

## WIBR3\_LRRK2\_G2019S\_5\_Het

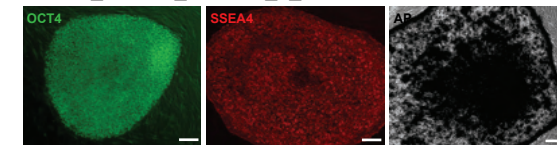

## WIBR3\_LRRK2\_G2019S\_6\_Het

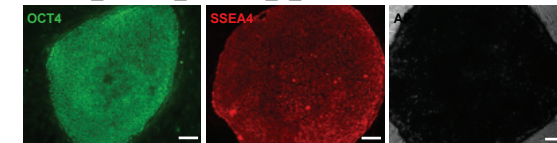

## WIBR3\_LRRK2\_G2019S\_65\_Homo

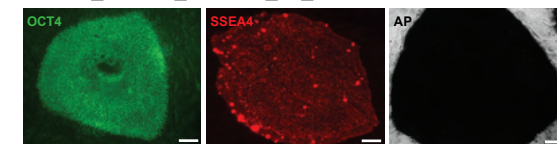

## WIBR3\_LRRK2\_G2019S\_216\_Het

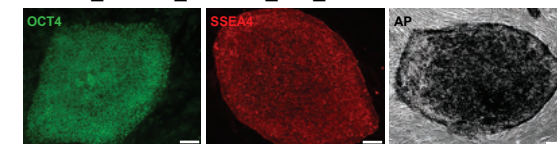

## WIBR3\_LRRK2\_G2019S\_2093\_Het

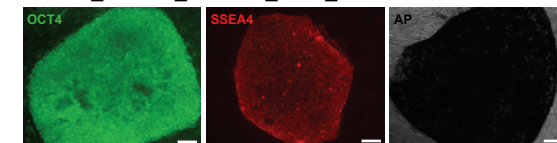

**D**

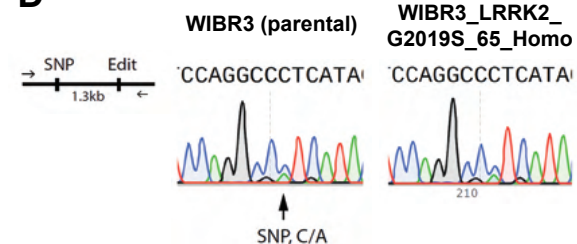

# Supplemental Figure 12. ATP13A2, Busquets et al.

## A

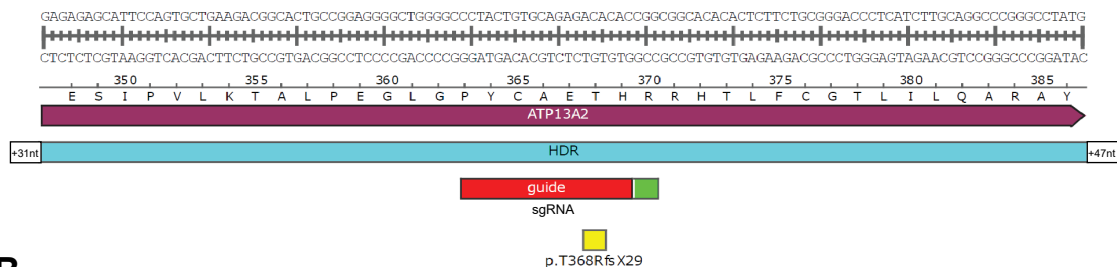

## B

### WIBR3\_ATP13A2\_FS\_Homo\_2\_5

CCTACTGTGCAGAGACACACCGGGCGGGCACACACTCTTTCTG-Reference  
 sgRNA  
 CTACTGTGCAGAGACA[A]CAC|CGGGCGGGCACACACTCTTTCTG-97.77% (10012 reads)

### WIBR3\_ATP13A2\_FS\_5\_6

CCTACTGTGCAGAGACACACCGGGCGGGCACACACTCTTTCTG-Reference  
 sgRNA  
 CCTACTGTGCAGAGACAC - - |CGGGCGGGCACACACTCTTTCTG-50.64% (5395 reads)  
 TACTGTGCAGAGAG[A]CACAC|CGGGCGGGCACACACTCTTTCTG-46.78% (4984 reads)

### WIBR3\_ATP13A2\_FS\_Homo\_6\_1

CCTACTGTGCAGAGACACACCGGGCGGGCACACACTCTTTCTG-Reference  
 sgRNA  
 TACTGTGCAGAGAG[A]CACAC|CGGGCGGGCACACACTCTTTCTG-97.82% (10070 reads)

### WIBR3\_ATP13A2\_FS\_Homo\_12\_2

CCTACTGTGCAGAGACACACCGGGCGGGCACACACTCTTTCTG-Reference  
 sgRNA  
 CTACTGTGCAGAGACA[A]CAC|CGGGCGGGCACACACTCTTTCTG-97.74% (9557 reads)

### WIBR3\_ATP13A2\_FS\_Homo\_12\_6

CCTACTGTGCAGAGACACACCGGGCGGGCACACACTCTTTCTG-Reference  
 sgRNA  
 CCTACTGTGCAGAGAC - CAC|CGGGCGGGCACACACTCTTTCTG-97.86% (10122 reads)

## C

### WIBR3\_ATP13A2\_FS\_Homo\_2\_5

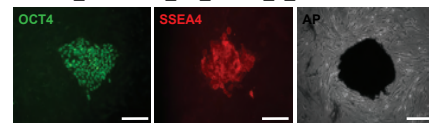

### WIBR3\_ATP13A2\_FS\_Homo\_12\_2

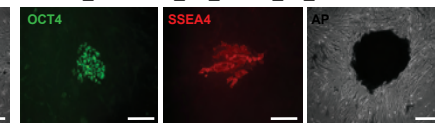

### WIBR3\_ATP13A2\_FS\_5\_6

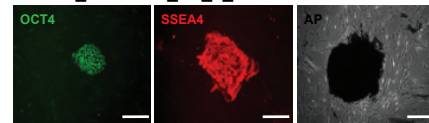

### WIBR3\_ATP13A2\_FS\_Homo\_12\_6

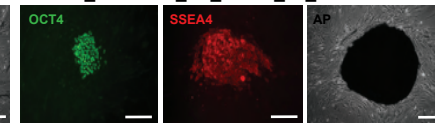

### WIBR3\_ATP13A2\_FS\_Homo\_6\_1

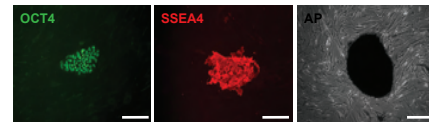

## D

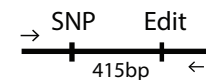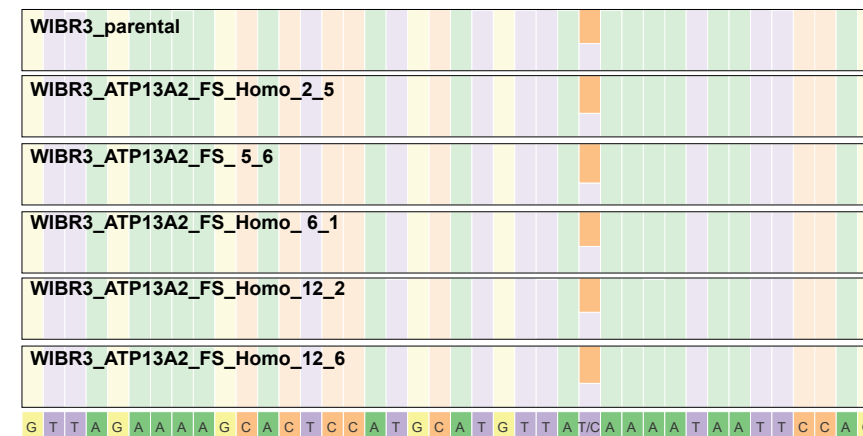

# Supplemental Figure 13. FBXO7, Busquets et al.

**A**

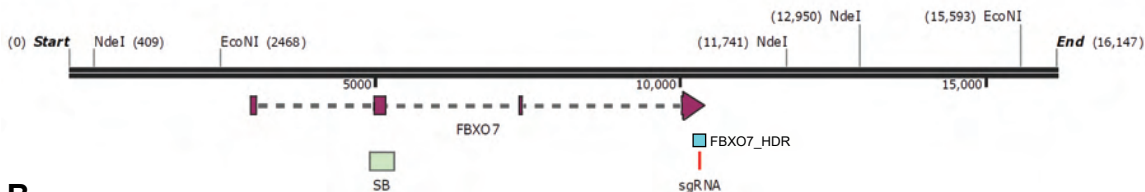

**B**

## WIBR3\_FBXO7\_FS\_A3-1

C C T A A C C C C A T C T T T G C C A G G G C G A G G C G G C C C C A A T G A C A -Reference  
 sgRNA

C C T A A C C C C A T C T T T G C C A G G G - C G A G G C G G C C C C A A T G A C A -97.52% (9296 reads)

**C**

## WIBR3\_FBXO7\_FS\_A3-1

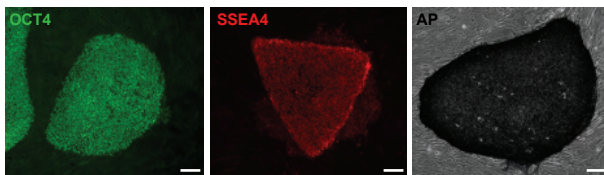

**F**

WIBR3 (parental)

WIBR3\_FBXO7\_FS\_A3-1

→ SNP Edit  
 ← 415bp ←

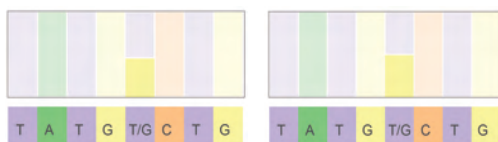

**D**

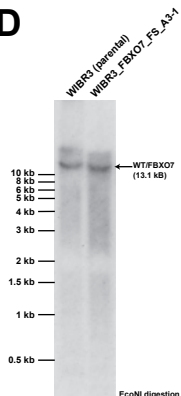

**E**

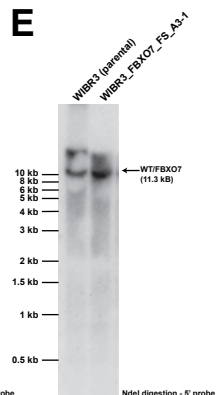

# Supplemental Figure 14. DNAJC6, Busquets et al.

## A

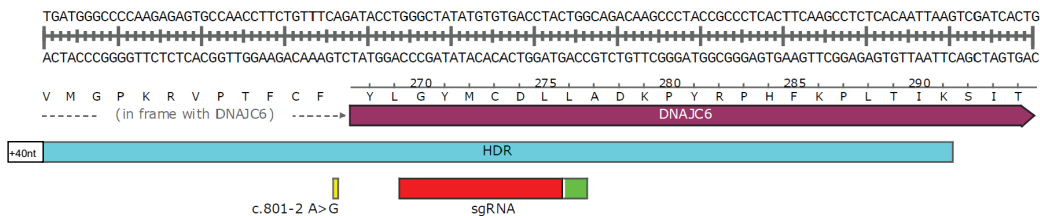

## B

### WIBR3\_DNAJC6\_c.801-2 A>G+FS/FS\_G12-2

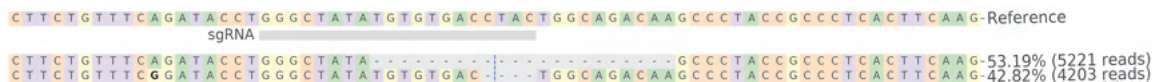

### WIBR3\_DNAJC6\_FS/FS\_H10-1

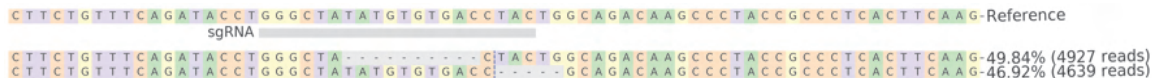

## C

### WIBR3\_DNAJC6\_c.801-2 A>G+FS/FS\_G12-2

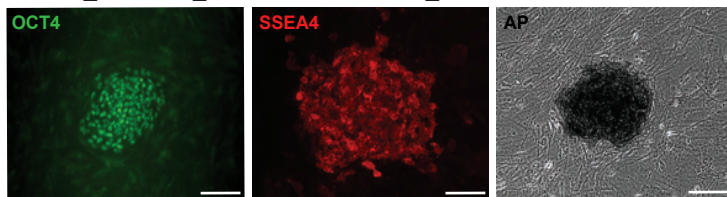

### WIBR3\_DNAJC6\_FS/FS\_H10-1

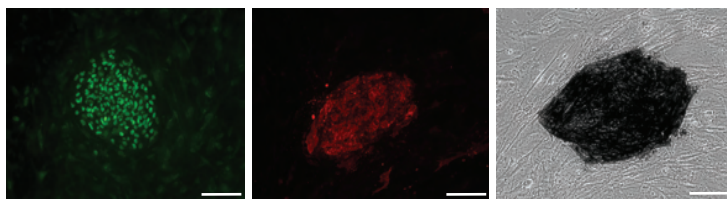

# Supplemental Figure 15. SYNJ1, Busquets et al.

## A

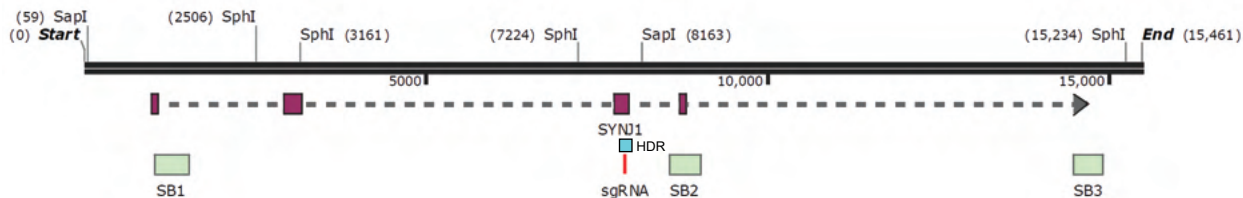

## B

### WIBR3\_SYNJ1\_R258Q\_Homo\_A5-1

G A G C T G G G A C C A G G T T T A A T G T C C G G G G A A C A A A T G A T G A -Reference

sgRNA

G A G C T G G G A C C A G G T T T A A T G T C C A G G G A A C A A A T G A T G A -96.73% (24738 reads)

### WIBR3\_SYNJ1\_R258Q/FS\_E4-1

G A G C T G G G A C C A G G T T T A A T G T C C G G G G A A C A A A T G A T G A -Reference

sgRNA

G A G C T G G G A C C A G G T T T A A T G T C C A G G G A A C A A A T G A T G A -51.66% (11370 reads)

G A G C T G G G A C C A G G T T T A A T T G T C C G G G G A A C A A A T G A T G -44.74% (9847 reads)

## C

### WIBR3\_SYNJ1\_R258Q\_Homo\_A5-1

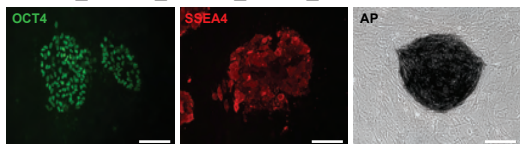

### WIBR3\_SYNJ1\_R258Q/FS\_E4-1

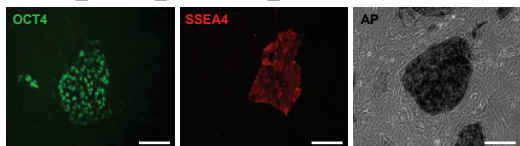

## D

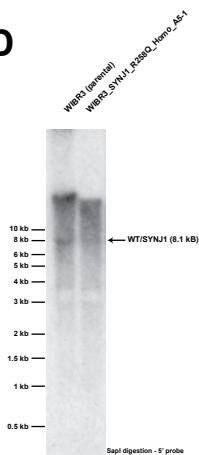

## E

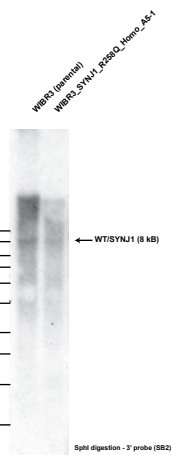

## F

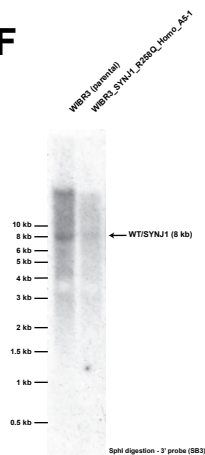

## Supplemental Figure 16. VPS13c, Busquets et al.

**A**

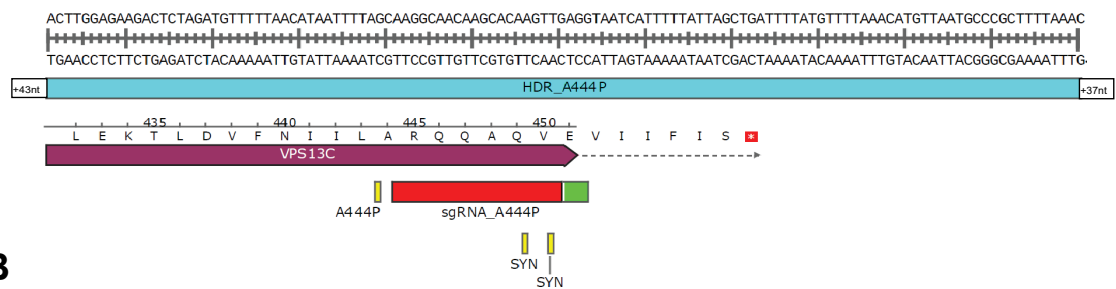

**B**

### WIBR3\_VPS13C\_A444P\_Homo\_C8-2

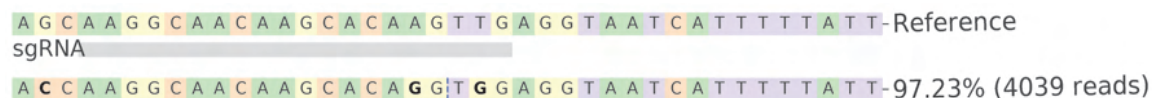

### WIBR3\_VPS13C\_A444P\_Het\_E12-1

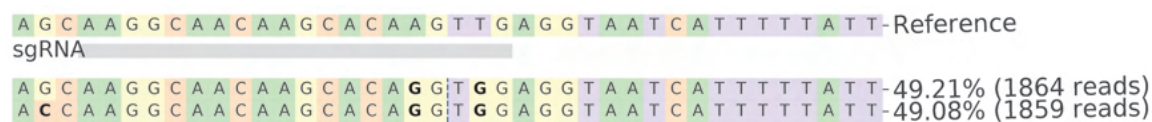

### WIBR3\_VPS13C\_FS\_Homo\_H3-1

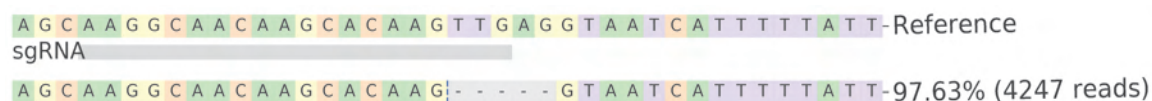

**E**

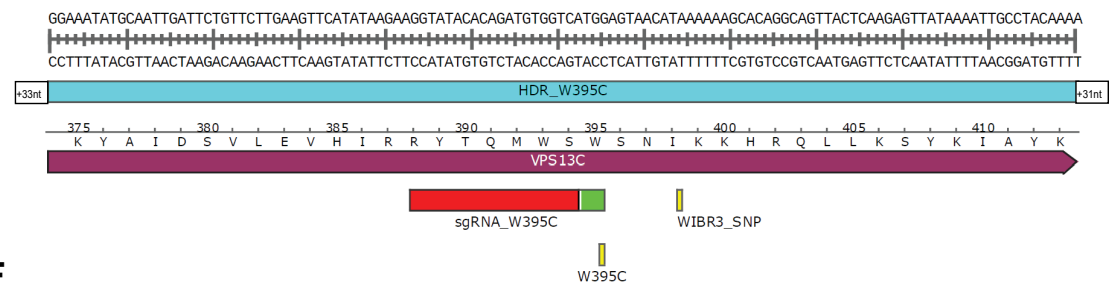

**F**

### WIBR3\_VPS13C\_W395C\_Homo\_C3-1

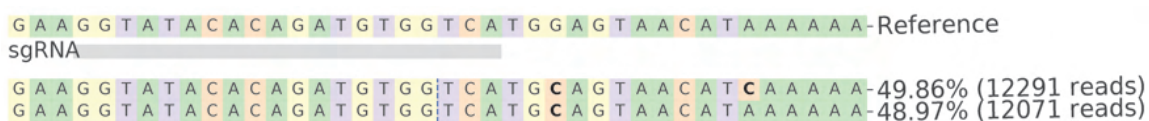

### WIBR3\_VPS13C\_W395C\_Homo\_C6-2

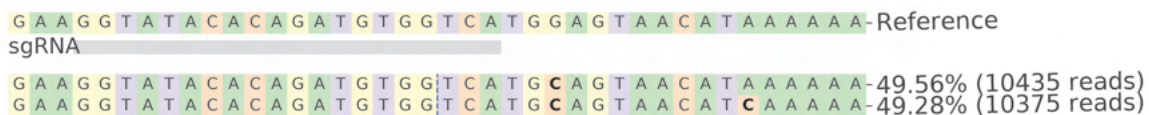

### WIBR3\_VPS13C\_W395C\_Homo\_C11-3

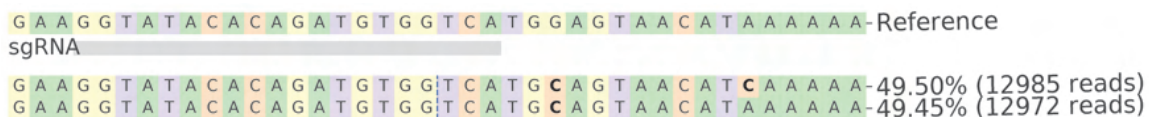

### WIBR3\_VPS13C\_FS\_Homo\_E10-2

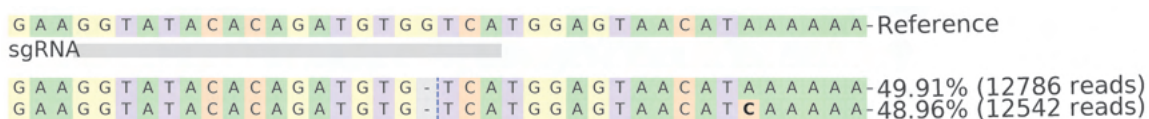

**C**

### WIBR3\_VPS13C\_A444P\_Homo\_C8-2

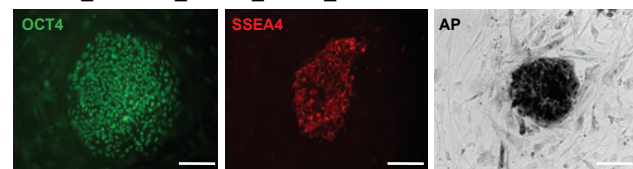

### WIBR3\_VPS13C\_A444P\_Het\_E12-1

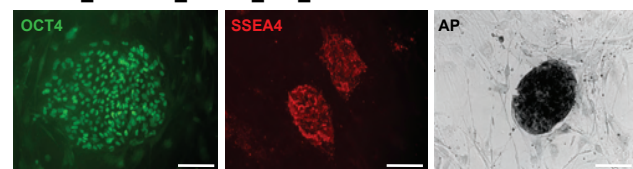

### WIBR3\_VPS13C\_FS\_Homo\_H3-1

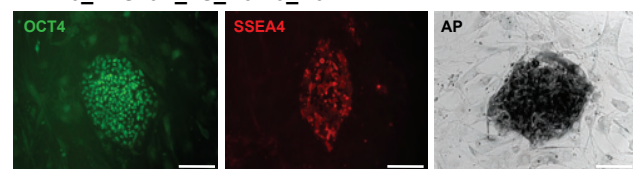

**D**

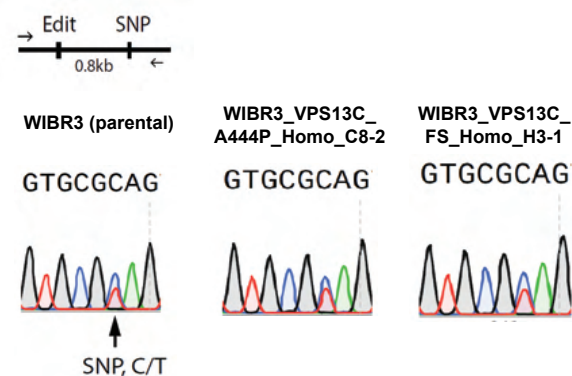

**G**

### WIBR3\_VPS13C\_W395C\_Homo\_C3-1

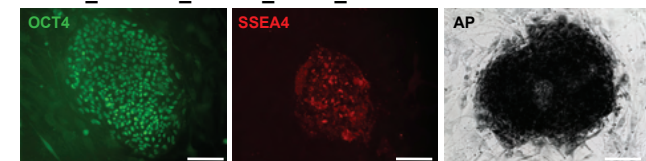

### WIBR3\_VPS13C\_W395C\_Homo\_C6-2

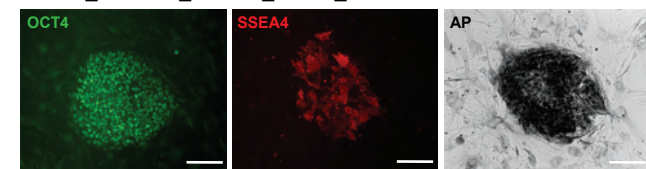

### WIBR3\_VPS13C\_W395C\_Homo\_C11-3

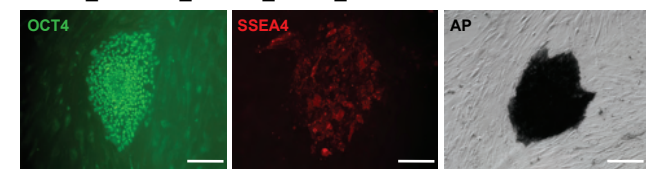

### WIBR3\_VPS13C\_FS\_Homo\_E10-2

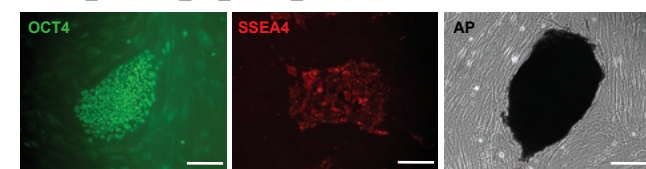



# Supplemental Figure 17. GBA, Busquets et al.

**A**

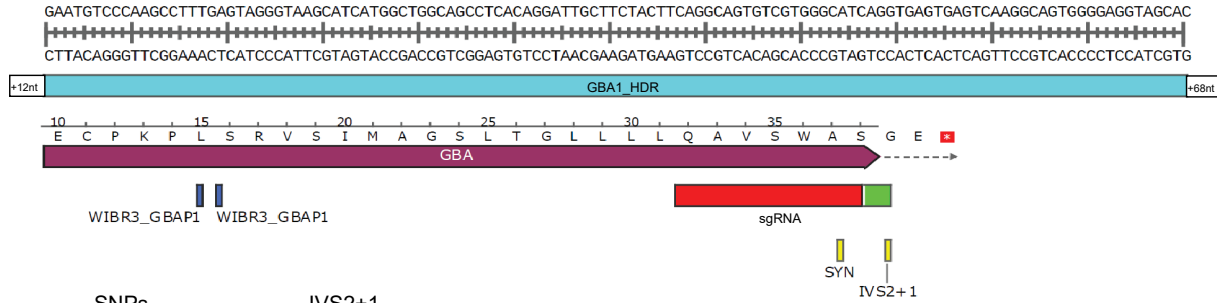

**B**

SNPs                      IVS2+1

CTTTGAGTA-89bp-GCATCAGGTTG GBA1, WT

CTTCGGGTA-89bp-GCATCAGATTG GBAP1

CTTTGAGTA-89bp-GCATCAGATTG GBA1, IVS2+1, G>A

CTTTGAGTA-89bp-GCTTCAGGTTG GBA1, A37=

**C**

## WIBR3\_GBA1\_IVS2\_Het\_3C3I

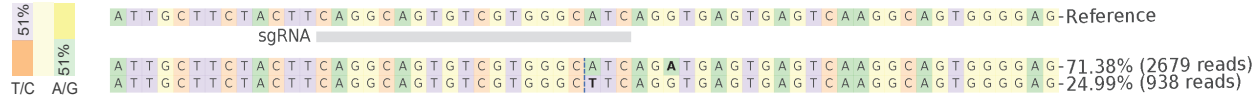

## WIBR3\_GBA1\_IVS2\_Het\_3C4B

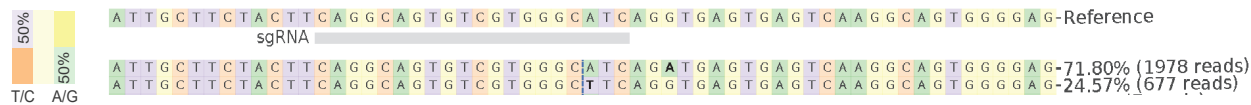

## WIBR3\_GBA1\_FS\_Het\_10C2F

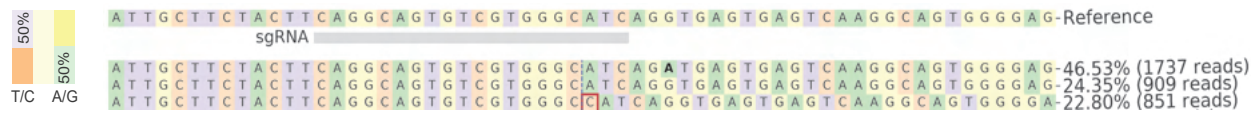

## WIBR3\_GBA1\_FS\_Het\_10D11A

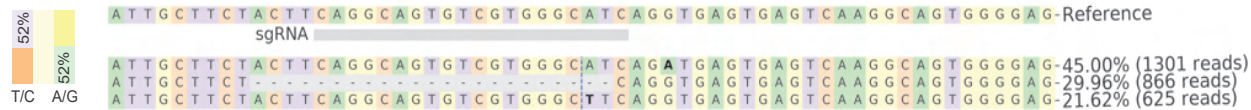

## WIBR3\_GBA1\_IVS2\_E10B

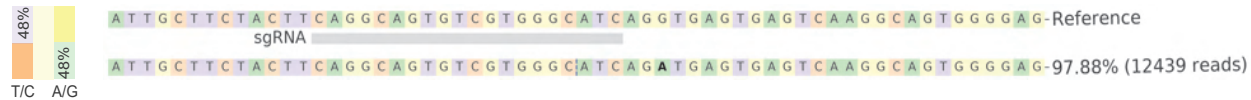

## WIBR3\_GBA1\_IVS2\_G2E

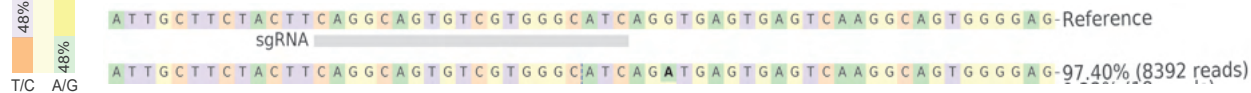

A C G T

**D**

## WIBR3\_GBA1\_IVS2\_Het\_3C3I

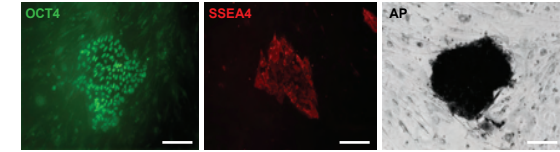

## WIBR3\_GBA1\_IVS2\_Het\_3C4B

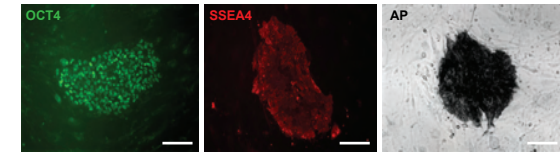

## WIBR3\_GBA1\_FS\_Het\_10C2F

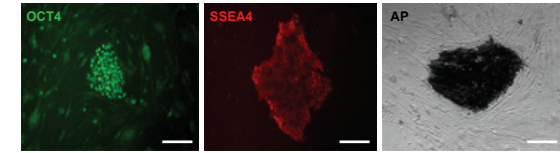

## WIBR3\_GBA1\_FS\_Het\_10D11A

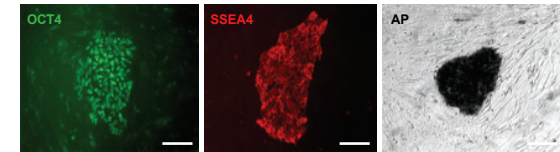

## WIBR3\_GBA1\_IVS2\_E10B

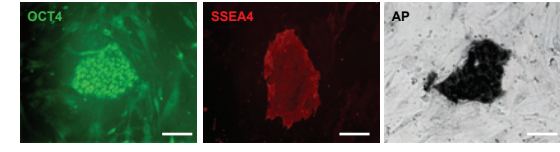

## WIBR3\_GBA1\_IVS2\_G2E

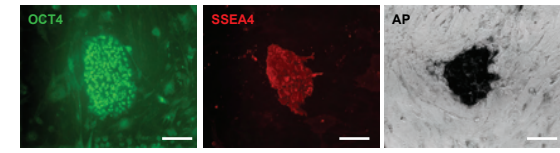

Supplement: NIHPP2024.02.12.579917V1-supplement-1.pdf [file NIHPP2024.02.12.579917V1-supplement-1.pdf]
